# Supplementary material for: JAK/STAT Inhibition Normalizes Lipid Composition in 3D Human Epidermal Equivalents Challenged with Th2 Cytokines
Source: MDPI journal article supplement (doi:10.3390/cells13090760), 2024-04-29
Supplement: s1 [file s1]

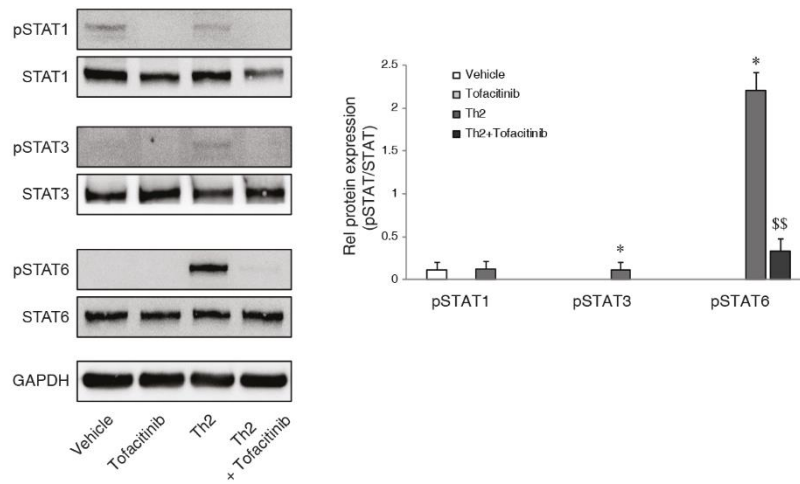

**Figure S1.** Effects of tofacitinib on STAT signalling (STAT1, STAT3, and STAT6) and their phosphorylated forms. Western blot analysis of pSTAT1/STAT1, pSTAT3/STAT3, and pSTAT6/STAT6 protein expression performed on 3D HEEs and HEEs treated with Th2 cytokines and tofacitinib. Representative blots are shown. GAPDH was used as endogenous loading control. Densitometric scanning of band intensities was performed to quantify the change in protein expression. Data represented the mean  $\pm$  SD of three independent experiments; \* $p$ <0.05 vs vehicle; \*\* $p$ <0.01 vs Th2.

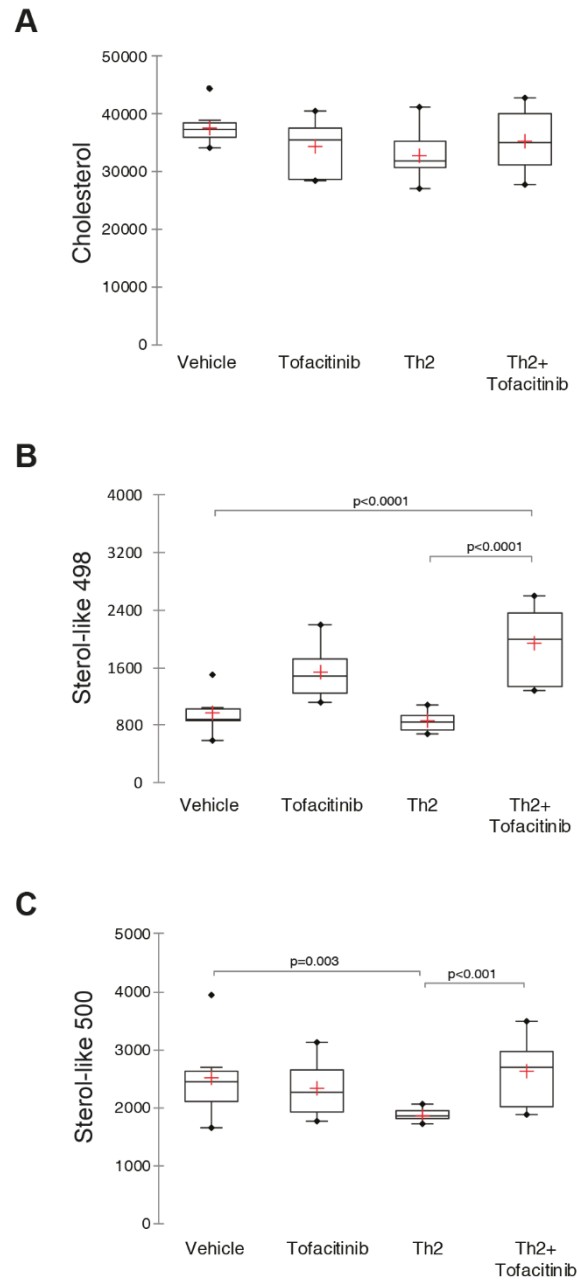

**Figure S2.** Box plots of cholesterol and sterol like metabolites. Concentration of (A) cholesterol and (B,C) congeners quantified in lipid extracts of 3D HEEs treated with vehicle, tofacitinib, Th2 cytokines, and with the combined tofacitinib and Th2 cytokines against deuterated cholesterol.

| 330713   Deuterated Ceramide LIPIDOMIX®                   |                 |                  |            |              |
|-----------------------------------------------------------|-----------------|------------------|------------|--------------|
| Compound name                                             | Formula         | Molecular weight | Exact mass | Conc $\mu$ M |
| C16 Ceramide-d7 (d18:1-d7/16:0)                           | C34H60D7NO3     | 544.94           | 544.5560   | 8            |
| C18 Ceramide-d7 (d18:1-d7/18:0)                           | C36H64D7NO3     | 573.00           | 572.5873   | 4            |
| C24 Ceramide-d7 (d18:1-d7/24:0)                           | C42H72D7NO3     | 657.16           | 652.6499   | 8            |
| C24:1 Ceramide-d7 (d18:1-d7/24:1(15Z))                    | C42H74D7NO3     | 655.14           | 654.6656   | 4            |
| 330731   EquiSPLASH™ LIPIDOMIX®                           |                 |                  |            |              |
| Compound name                                             | Formula         | Molecular weight | Exact mass | Conc $\mu$ M |
| 15:0-18:1(d7) PC                                          | C41H73D7NO8P    | 753.11           | 752.6061   | 27           |
| 18:1(d7) Lyso PC                                          | C26H45D7NO7P    | 528.72           | 528.3921   | 38           |
| 15:0-18:1(d7) PE                                          | C38H67D7NO8P    | 711.03           | 710.5591   | 28           |
| 18:1(d7) Lyso PE                                          | C23H39D7NO7P    | 486.64           | 486.3451   | 41           |
| 15:0-18:1(d7) PG (Na Salt)                                | C39H67D7NaO10P  | 764.02           | 763.5357   | 26           |
| 15:0-18:1(d7) PI (NH4 Salt)                               | C42H75D7NO13P   | 847.13           | 846.5963   | 24           |
| 15:0-18:1(d7) PS (Na Salt)                                | C39H66D7NNaO10P | 777.02           | 776.5309   | 26           |
| 15:0-18:1(d7)-15:0 TG                                     | C51H89D7O6      | 812.37           | 811.7646   | 25           |
| 15:0-18:1(d7) DG                                          | C36H61D7O5      | 587.98           | 587.5506   | 34           |
| 18:1(d7) MG                                               | C21H33D7O4      | 363.59           | 363.3366   | 55           |
| 18:1(d7) Chol Ester                                       | C45H71D7O2      | 658.16           | 657.6441   | 30           |
| d18:1-18:1(d9) SM                                         | C41H72D9N2O6P   | 738.12           | 737.6397   | 27           |
| C15 Ceramide-d7 (d18:1-d7/15:0)                           | C33H58D7NO3     | 530.92           | 530.5404   | 38           |
| In-house Standards MIX                                    |                 |                  |            |              |
| Compound name                                             | Formula         | Molecular weight | Exact mass | Conc $\mu$ M |
| Hexadecanoic-d17 Acid (d17-PA)                            | C16H15D17O2     | 273.53           | 273.3469   | 80           |
| n-Hexadecyl-1,1,2,2-d4 Hexadecanoate-16,16,16-d3 (d17-PA) | C32H57D7O2      | 487.90           | 487.5346   | 40           |
| Glyceryl trihexadecanoate-d98 (d98TG 48:0)                | C51D98O6        | 905.92           | 905.3515   | 20           |
| Deuterated cholesterol sulfate sodium salt (d7-CHS)       | C27H38D7NaO4S   | 495.34           | 495.3376   | 20           |
| N-palmitoyl-d31-D-erythro-sphingosine (d31-Cer16:0)       | C34H37D30NO3    | 569.10           | 567.7004   | 1            |
| Deuterated cholesterol-2,2,3,4,4,6-d6                     | C27H40D6O       | 392.70           | 392.3925   | 40           |

**Table S1.** List of the deuterated internal standards used for extraction protocol and semi-quantitative analyses.

| Oligonucleotide sequences (5'-3')                                                     | Amplicone size | Accession number |
|---------------------------------------------------------------------------------------|----------------|------------------|
| <b>ABCA12</b><br>sense: ACAGGAATGGCCTTCATCAC<br>antisense: AACATGGTGCCCTGAGAAAC       | 317 bp         | NM_015657.4      |
| <b>ACADS</b><br>sense: CCTCAGCGAACCAGGGAAC<br>antisense: TTCAGAACCCATGAGTCGCC         | 81 bp          | NM_000017.4      |
| <b>ACAT1</b><br>sense: GGAGGCTGGTGCAGGAAA<br>antisense: TCCAATGGGTGTTCTTGTAGC         | 101 bp         | NM_001386677.1   |
| <b>ACOX1</b><br>sense: CGCCGAGAGATCGAGAACAT<br>antisense: GACAGCCACCTCATAACGCT        | 96 bp          | NM_004035.7      |
| <b>ALOX3</b><br>sense: CACCTACACCAATTTCTGCCTTCC<br>antisense: GCCCACGATTTCTGAGACAAAGC | 133 bp         | NM_021628.3      |
| <b>ALOX12B</b><br>sense: GCTGCTGGTGCTCTGGAC<br>antisense: CTGGCGGATGTCGTGTGAG         | 151 bp         | NM_001139.3      |
| <b>CA2</b><br>sense: AACAAATGGTCATGCTTTCAACG<br>antisense: TGTCCATCAAGTGAACCCCAG      | 128 bp         | NM_000067.3      |
| <b>CASP14</b><br>sense: ACATCGCCTACCGACATGATC<br>antisense: CCGGGTCACCTCTGTCAGAA      | 110 bp         | NM_012114.3      |
| <b>CCL26</b><br>sense: GCTGCTTCCAATACAGCCACA<br>antisense: TCCTTGGATGGGTACAGACTTTC    | 135 bp         | NM_001371936.1   |
| <b>CD36</b><br>sense: CTCTTTCCTGCAGCCCAATG<br>antisense: CTGCCACAGCCAGATTGAGA         | 95 bp          | NM_001001548.3   |
| <b>CERS1</b><br>sense: CAATGTGGGCATCCTTGTGCT<br>antisense: AGTAGAGGCGGAACCAGAAC       | 176 bp         | NM_001387443.1   |
| <b>CERS2</b><br>sense: GCCAGGTAGAGCGTTGGTTC<br>antisense: GGCAATGAAGGCAATCAGGT        | 113 bp         | NM_181746.4      |
| <b>CERS3</b><br>sense: TCTCTGCTGACTGCATCTATTG<br>antisense: GAAGCCAGAATCTTTCCAACC     | 145 bp         | NM_001290341.2   |
| <b>CERS4</b><br>sense: GCAGTATCAGCAAGTGTGCG<br>antisense: CCTGTTGCTGATGGACTCGT        | 124 bp         | NM_024552.3      |
| <b>CERS5</b><br>sense: TGACACCCTTTTTGTGATCTTCA<br>antisense: GAAGCATAAGGCCCGATTAT     | 120 bp         | NM_001331069.3   |

|                                                                                                    |        |                |
|----------------------------------------------------------------------------------------------------|--------|----------------|
| <b>CERS6</b><br>sense: GGGCGGACCTGAAGAACAC<br>antisense: CGCACGGTTTGGCTACAAAT                      | 129 bp | NM_203463.3    |
| <b>CPT1<math>\alpha</math></b><br>sense: CGTCTTTTGGGATCCACGATT<br>antisense TGTGCTGGATGGTGTCTGTCTC | 100 bp | NM_001876.4    |
| <b>DEGS1</b><br>sense: GTCTACACCGACCAGCCG<br>antisense: GCATAGGCCCCAAATATGACC                      | 188 bp | NM_001321541.2 |
| <b>DEGS2</b><br>sense: GGTGCCTGTGCCCTACATTA<br>antisense: GGCCTCAAGCTCCACTCATC                     | 135 bp | NM_206918.3    |
| <b>DHCR7</b><br>sense: GCAGGGGTTGTGAACAAGTAT<br>antisense:GAGACGGCATAGCCAAGGAT                     | 167 bp | NM_001360.3    |
| <b>DHCR24</b><br>sense: AGTCCAGTTCCCCGTTTA<br>antisense: CTTACCCAGCACCTTCAA                        | 163 bp | NM_014762.4    |
| <b>ELOVL1</b><br>sense: CCAAGGTCAAGGCCAACTGA<br>antisense: CTGACGGACACTGCCCTAAG                    | 87 bp  | NM_001256401.2 |
| <b>ELOVL2</b><br>sense: CTCCCTCTTGTGCCAGTCAG<br>antisense: GACTCCAGTGCTTGCTCAGA                    | 106 bp | NM_017770.4    |
| <b>ELOVL3</b><br>sense: CAATGAAGCTCCAGGCTCTC<br>antisense: AACCATGCAGGTAAGGCAAC                    | 90 bp  | NM_152310.3    |
| <b>ELOVL4</b><br>sense: CCGGAATGGTCAAATCTCTCC<br>antisense: ACACCATCATCATCAAGCCTC                  | 111 bp | NM_022726.4    |
| <b>ELOVL5</b><br>sense: AGGAAGGGTGTAGGGTGAGT<br>antisense: AACCAGTTCCCCATTGCTCA                    | 181 bp | NM_001242830.2 |
| <b>ELOVL6</b><br>sense: CTTTGTTCAGTTGCCCCGG<br>antisense: TTCGGCTCACCTCTTTCCC                      | 175 bp | NM_001130721.2 |
| <b>ELOVL7</b><br>sense: TATTCACGGTCACCCACAGC<br>antisense: CCAAACCACCTGCAGCAAAT                    | 199 bp | NM_001104558.2 |
| <b>FADS-2</b><br>sense: TGTCTACAGAAAACCCAAGTGG<br>antisense: TGTGGAAGATGTTAGGCTTGG                 | 128 bp | NM_001281502   |
| <b>FAS</b><br>sense: GACCGCTTCCGAGATTCC<br>antisense: GATGGCAGTCAGGCTCAC                           | 137 bp | NM_004104      |
| <b>FLG</b>                                                                                         |        |                |

|                                                                                                   |        |                |
|---------------------------------------------------------------------------------------------------|--------|----------------|
| sense: GAAGACAAGGATCGCACCAG<br>antisense: ATGGTGTCTGACCCCTCTTG                                    | 76 bp  | NM_002016.2    |
| <b>GAPDH</b><br>sense: TGCACCACCAACTGCTTAGC<br>antisense: GGCATGGACTGTGGTCATGAG                   | 198 bp | NM_001289746   |
| <b>HMGB1</b><br>sense: GTGCCTCGCTGAGGAAAAAT<br>antisense: TCCTCCCGACAAGTTTGCAC                    | 105 bp | NM_001363661.2 |
| <b>HMG-CoA reductase</b><br>sense: AGCTACAATGTTGTCAAGAC<br>antisense: GCAGATGGTCAGTGTCAC          | 97 bp  | NM_000859.3    |
| <b>HMG-CoA synthase</b><br>sense: GTATGCCCTGGTAGTTGCAGGAG<br>antisense: TGTTCATATGTGTCCACGAA      | 147 bp | NM_001324220.2 |
| <b>IL-1<math>\alpha</math></b><br>sense: CGCCAATGACTCAGAGGAAGA<br>antisense: AGGGCGTCATTCAGGATGAA | 120 bp | NM_000575      |
| <b>IL-1<math>\beta</math></b><br>sense: CTGAGCTCGCCAGTGAAATG<br>antisense: TTAGGGCCATCAGCTTCAA    | 77 bp  | NM_000576.2    |
| <b>IL-6</b><br>sense: AGCCACTCACCTCTTCAGAACG<br>antisense: GGTTCAGGTTGTTTTCTGCCAG                 | 141 bp | NM_000600      |
| <b>IL-8</b><br>sense: CTTGGCAGCCTTCCTGATTTC<br>antisense: TTCTGTGTTGGCGCAGTGTG                    | 168 bp | NM_000584      |
| <b>IVL</b><br>sense: ACCCATCAGGAGCAAATGAAA<br>antisense: GCTCGACAGGCACCTTCTGGC                    | 67 bp  | NM_005547.4    |
| <b>K6</b><br>sense: AGTCCTGCTTCTCTTC<br>antisense: CTGCTGTGGCTCCTGATG                             | 107 bp | NM_005554.4    |
| <b>K10</b><br>sense: TGATGTGAATGTGGAAATGAATGC<br>antisense: GTAGTCAGTTCCTTGCTCTTTCA               | 147 bp | NM_000421.5    |
| <b>LOR</b><br>sense: TCATGATGCTACCCGAGGTTTG<br>antisense: CAGAACTAGATGCAGCCGGAGA                  | 87 bp  | NM_000427.3    |
| <b>PPAR<math>\gamma</math></b><br>sense: GCCAAGCTGCTCCAGAAAAT<br>antisense: TGATCACCTGCAGTAGCTGCA | 73 bp  | NM_138711      |
| <b>PDPN</b><br>sense: TGA TCCAGGAACCAGCGAAG<br>antisense: GCGAATGCCTGTTACACTGTTGA                 | 86 bp  | NM_006474.5    |
| <b>PLIN1</b><br>sense: ACATTAAAGGGAAGAAGTTGAAGC                                                   | 93 bp  | NM_002666.5    |

|                                                                                          |        |                |
|------------------------------------------------------------------------------------------|--------|----------------|
| antisense: TTCTCCTGCTCAGGGAGGT                                                           |        |                |
| <b>PLIN2</b><br>sense: TGAGATGGCAGAGAACGGTG<br>antisense: GCAATTTGCGGCTCTAGCTT           | 90 bp  | NM_001122.4    |
| <b>PLIN5</b><br>sense: AAGGCCCTGAAGTGGGTTC<br>antisense: GCATGTGGTCTATCAGCTCCA           | 192 bp | NM_001013706.3 |
| <b>SCD-1</b><br>sense: CATAATTCCCGACGTGGCTTT<br>antisense: AGGTTTGTAGTACCTCCTCTGGAACA    | 150 bp | NM_005063      |
| <b>SLC27A4 (FATP4)</b><br>sense: AAATCGGGGAGTTCTACGGC<br>antisense: CAGGATGCGGCTGTTGAAAC | 95 bp  | NM_198580.3    |
| <b>SPT</b><br>sense: TGGTCATTTGGCCCAGGTC<br>antisense: TTCCAACCATTTGGC TTCACATC          | 121 bp | NM_004863.4    |
| <b>SREBP-1</b><br>sense: GGAGCCATGGATTGCACTTT<br>antisense: TCAAATAGGCCAGGGAAGTCA        | 77 bp  | NM_001005291   |
| <b>SREBP-2</b><br>sense: CCGCCTGTTCCGATGTACAC<br>antisense: TGCACATTCAGCCAGGTTCA         | 56 bp  | NM_004599.4    |
| <b>TGM1</b><br>sense: TCTTCAAGAACCCCTTCCC<br>antisense: TCTGTAACCCAGAGCCT                | 69 bp  | NM_000359.3    |
| <b>TSLP</b><br>sense: TGGGGGCTGGTGCCCTACTC<br>antisense: AATTGGCCCCGAAGGCTGGC            | 118 bp | NM_033035.5    |

**Table S2.** Forward (F) and reverse (R) primers used for the Real time RT-PCR analysis.

| Differentiation  |             |           |                 |
|------------------|-------------|-----------|-----------------|
|                  | Tofacitinib | Th2       | Th2+Tofacitinib |
| <i>CASP14</i>    | 0,91±0,07   | 0,52±0,24 | 0,85±0,13       |
| <i>FLG</i>       | 1,35±0,69   | 0,55±0,26 | 0,96±0,28       |
| <i>K6</i>        | 1,41±0,55   | 1,93±0,22 | 1,20±0,28       |
| <i>K10</i>       | 1,47± 0,65  | 1,16±0,52 | 1,15±0,24       |
| <i>LOR</i>       | 1,00±0,41   | 0,58±0,28 | 0,86±0,36       |
| <i>IVL</i>       | 1,03±0,42   | 1,00±0,04 | 0,96±0,18       |
| <i>TGM1</i>      | 1,29±1,05   | 1,10±0,52 | 1,28±1,06       |
|                  |             |           |                 |
| Inflammation     |             |           |                 |
| <i>CCL26</i>     | 1,37±0,95   | 7,47±3,07 | 0,87±0,47       |
| <i>IL-1α</i>     | 0,95±0,17   | 1,89±0,12 | 0,79±0,04       |
| <i>IL-1β</i>     | 0,93±0,18   | 1,72±0,23 | 0,78±0,24       |
| <i>IL-6</i>      | 0,55±0,22   | 8,20±1,83 | 0,62±0,19       |
| <i>IL-8</i>      | 1,09±0,22   | 1,90±0,73 | 0,98±0,31       |
| <i>PDPN</i>      | 0,81±0,17   | 2,49±0,32 | 0,83±0,11       |
| <i>TSLP</i>      | 1,18±0,21   | 0,93±0,20 | 1,15±0,28       |
|                  |             |           |                 |
| Lipid metabolism |             |           |                 |
| <i>ABCA12</i>    | 1,17±0,46   | 1,03±0,16 | 1,01±0,31       |
| <i>ALOX3</i>     | 0,79±0,17   | 1,26±0,44 | 0,89±0,29       |
| <i>ALOX12B</i>   | 0,80±0,23   | 1,41±0,35 | 1,16±0,85       |
| <i>CA2</i>       | 0,85±0,005  | 5,03±1,55 | 0,93±0,30       |
| <i>CD36</i>      | 1,84±1,13   | 1,40±0,72 | 1,20±0,07       |
| <i>CERS1</i>     | 0,58±0,36   | 1,07±0,33 | 1,09±0,30       |
| <i>CERS2</i>     | 1,21±0,60   | 1,04±0,22 | 1,08±0,42       |
| <i>CERS3</i>     | 0,96±0,23   | 0,73±0,19 | 0,92±0,26       |
| <i>CERS4</i>     | 0,88±0,13   | 0,73±0,17 | 0,72±0,17       |
| <i>CERS5</i>     | 1,06±0,42   | 1,13±0,50 | 1,11±0,51       |
| <i>CERS6</i>     | 0,90±0,23   | 1,10±0,35 | 0,93±0,31       |
| <i>DEGS1</i>     | 0,92±0,19   | 1,03±0,34 | 0,91±0,15       |
| <i>DEGS2</i>     | 1,16±0,39   | 1,59±0,29 | 0,70±0,16       |
| <i>DHCR7</i>     | 1,35±0,58   | 0,95±0,08 | 1,19±0,21       |
| <i>DHCR24</i>    | 1,48±0,87   | 1,03±0,23 | 1,13±0,34       |
| <i>ELOVL1</i>    | 1,24±0,61   | 0,63±0,12 | 0,95±0,47       |
| <i>ELOVL2</i>    | 1,31±0,66   | 1,25±1,27 | 0,78±0,17       |
| <i>ELOVL3</i>    | 0,72±0,30   | 0,21±0,16 | 0,71±0,27       |
| <i>ELOVL4</i>    | 1,06±0,11   | 0,47±0,17 | 0,86±0,11       |
| <i>ELOVL5</i>    | 0,69±0,33   | 1,41±0,59 | 0,97±0,19       |
| <i>ELOVL6</i>    | 1,10±0,13   | 1,02±0,26 | 0,93±0,27       |
| <i>ELOVL7</i>    | 1,56± 0,80  | 1,29±0,58 | 0,89±0,09       |
| <i>FADS</i>      | 1,51±1,33   | 0,77±0,45 | 1,46±1,42       |
| <i>FAS</i>       | 1,23±0,57   | 1,04±0,47 | 0,94±0,07       |
| <i>HMGB1</i>     | 0,93±0,15   | 1,02±0,17 | 1,07±0,26       |



|                                      |            |           |           |
|--------------------------------------|------------|-----------|-----------|
| <i>HMG-CoA reductase</i>             | 1,12±0,52  | 1,39±0,99 | 0,93±0,13 |
| <i>HMG-CoA synthase</i>              | 1,19±0,38  | 0,94±0,28 | 1,01±0,39 |
| <b><i>PLIN1</i></b>                  | 0,81±0,29  | 0,40±0,11 | 0,96±0,20 |
| <b><i>PLIN2</i></b>                  | 1,19±0,34  | 0,21±0,11 | 0,73±0,03 |
| <i>PLIN5</i>                         | 1,53±1,71  | 0,89±0,38 | 1,05±1,09 |
| <i>SCD</i>                           | 1,19±0,03  | 0,85±0,06 | 0,98±0,17 |
| <i>SLC27A4</i>                       | 1,26 ±0,57 | 0,89±0,37 | 0,91±0,06 |
| <b><i>SPT</i></b>                    | 1,14±0,19  | 0,55±0,05 | 1,08±0,19 |
|                                      |            |           |           |
| <b><i>Mitochondrial function</i></b> |            |           |           |
| <i>ACADS</i>                         | 1,08±0,18  | 1,31±0,23 | 1,03±0,25 |
| <b><i>ACAT1</i></b>                  | 0,90±0,17  | 1,62±0,16 | 1,09±0,24 |
| <i>ACOX1</i>                         | 1,02±0,26  | 1,35±0,16 | 0,93±0,11 |
| <b><i>CPT1α</i></b>                  | 0,90±0,15  | 1,53±0,14 | 1,10±0,14 |
|                                      |            |           |           |
| <b>Transcription Factors</b>         |            |           |           |
| <i>SREBP1</i>                        | 1,78±1,15  | 0,89±0,54 | 1,05±0,19 |
| <i>SREBP2</i>                        | 1,37±0,42  | 0,89±0,51 | 0,94±0,12 |
| <b><i>PPARγ</i></b>                  | 1,09±0,58  | 0,57±0,27 | 0,97±0,40 |

**Table S3.** mRNA expression of inflammatory and lipid genes in treated HEEs compared to vehicle. Mean values and standard deviation (SD) of fold changes (FC) of mRNA expression of inflammatory and lipid genes in Th2 and tofacitinib-treated HEEs compared to vehicle. The genes whose transcription was significantly modified with treatments are reported in bold.

| Compound        | Technique  | Neutral Mass | p ( [Th2] vs [Th2+T] vs [T] vs [V] ) | q-value | P ([Th2+T] vs [Th2]) | p ([T] vs [Th2]) | p ([V] vs [Th2]) | p ([V] vs [Th2+T]) | p ([V] vs [T]) |
|-----------------|------------|--------------|--------------------------------------|---------|----------------------|------------------|------------------|--------------------|----------------|
| FA 16:1n-7      | GCMS (TMS) | 311.3000     | 0.0000                               | 0.000   | 0.000                | 0.000            | 0.000            |                    |                |
| FA 27:0         | LCMS (HR)  | 410.4122     | 0.0075                               | 0.030   |                      |                  | 0.008            |                    |                |
| FA 29:0         | LCMS (HR)  | 438.4433     | 0.0074                               | 0.030   |                      |                  | 0.023            | 0.030              |                |
| FA 30:0         | LCMS (HR)  | 452.4591     | 0.0079                               | 0.030   |                      |                  | 0.005            |                    |                |
| Sterol-like 458 | GCMS (TMS) | 458.0000     | 0.0002                               | 0.002   | 0.007                | 0.000            |                  |                    | 0.004          |
| Sterol-like 498 | GCMS (TMS) | 498.0000     | 0.0000                               | 0.000   | 0.000                | 0.000            |                  | 0.000              | 0.001          |
| HexCer 42:1;O2  | LCMS (HR)  | 811.6972     | 0.0143                               | 0.047   |                      |                  | 0.049            | 0.030              | 0.026          |
| HexCer 44:1;O2  | LCMS (HR)  | 839.7276     | 0.0075                               | 0.030   |                      |                  | 0.049            | 0.025              | 0.009          |
| HexCer 48:2;O2  | LCMS (HR)  | 893.7699     | 0.0036                               | 0.021   | 0.016                | 0.029            | 0.004            |                    |                |
| Cer[NH]40:1     | LCMS (HR)  | 637.5973     | 0.0140                               | 0.047   |                      | 0.048            |                  |                    |                |
| TG 44:2         | LCMS (HR)  | 746.6431     | 0.0003                               | 0.003   | 0.001                | 0.001            |                  | 0.034              | 0.046          |
| TG 46:3         | LCMS (HR)  | 772.6581     | 0.0000                               | 0.000   | 0.000                | 0.000            |                  | 0.006              | 0.020          |
| TG 46:2         | LCMS (HR)  | 774.6750     | 0.0000                               | 0.000   | 0.000                | 0.000            | 0.017            | 0.000              | 0.000          |
| TG 46:1         | LCMS (HR)  | 776.6905     | 0.0001                               | 0.001   | 0.000                | 0.001            |                  | 0.027              |                |
| TG 48:4         | LCMS (HR)  | 798.6726     | 0.0004                               | 0.004   | 0.001                | 0.003            |                  |                    |                |
| TG 48:3         | LCMS (HR)  | 800.6894     | 0.0000                               | 0.000   | 0.000                | 0.000            | 0.000            | 0.000              | 0.000          |
| TG 48:2         | LCMS (HR)  | 802.7060     | 0.0000                               | 0.000   | 0.000                | 0.000            | 0.024            | 0.003              | 0.018          |
| TG 48:1         | LCMS (HR)  | 804.7221     | 0.0070                               | 0.030   | 0.007                | 0.021            |                  |                    |                |
| TG 48:0         | LCMS (HR)  | 806.7366     | 0.0020                               | 0.013   |                      |                  | 0.001            |                    | 0.045          |
| TG 50:5         | LCMS (HR)  | 824.6894     | 0.0079                               | 0.030   | 0.008                | 0.036            |                  |                    |                |
| TG 50:4         | LCMS (HR)  | 826.7046     | 0.0000                               | 0.000   | 0.000                | 0.000            | 0.009            | 0.000              | 0.001          |
| TG 50:3         | LCMS (HR)  | 828.7207     | 0.0000                               | 0.000   | 0.000                | 0.000            | 0.002            | 0.000              | 0.004          |
| TG 50:2         | LCMS (HR)  | 830.7370     | 0.0008                               | 0.006   | 0.001                | 0.004            |                  |                    |                |
| TG 51:2         | LCMS (HR)  | 844.7524     | 0.0010                               | 0.008   | 0.001                | 0.018            | 0.014            |                    |                |
| TG 52:5         | LCMS (HR)  | 852.7207     | 0.0000                               | 0.000   | 0.000                | 0.001            |                  | 0.002              | 0.035          |
| TG 52:4         | LCMS (HR)  | 854.7361     | 0.0000                               | 0.000   | 0.000                | 0.000            |                  | 0.000              | 0.003          |
| TG 52:3         | LCMS (HR)  | 856.7523     | 0.0001                               | 0.001   | 0.000                | 0.001            |                  | 0.016              |                |
| TG 53:3         | LCMS (HR)  | 870.7668     | 0.0010                               | 0.008   | 0.001                | 0.006            | 0.030            |                    |                |
| TG 54:4         | LCMS (HR)  | 882.7672     | 0.0006                               | 0.005   | 0.001                | 0.014            |                  | 0.007              |                |
| DG 34:0         | LCMS (HR)  | 596.5380     | 0.0076                               | 0.030   |                      |                  | 0.016            | 0.014              | 0.037          |
| DG 34:2         | LCMS (HR)  | 592.5067     | 0.0000                               | 0.000   | 0.000                | 0.001            | 0.001            |                    |                |
| DG 35:0         | LCMS (HR)  | 610.5536     | 0.0065                               | 0.030   |                      |                  | 0.010            | 0.014              | 0.046          |
| DG 36:1         | LCMS (HR)  | 622.5536     | 0.0000                               | 0.000   | 0.000                | 0.000            |                  | 0.004              | 0.000          |
| DG 37:0         | LCMS (HR)  | 638.5849     | 0.0076                               | 0.030   |                      |                  | 0.015            | 0.011              |                |
| DG 38:0         | LCMS (HR)  | 652.6006     | 0.0055                               | 0.029   |                      |                  | 0.007            | 0.015              | 0.049          |
| DG 38:1         | LCMS (HR)  | 650.5849     | 0.0012                               | 0.009   | 0.039                | 0.002            |                  |                    | 0.013          |
| DG 38:2         | LCMS (HR)  | 648.5693     | 0.0144                               | 0.047   | 0.039                | 0.027            |                  |                    |                |
| DG 40:0         | LCMS (HR)  | 680.6319     | 0.0105                               | 0.038   |                      |                  | 0.013            | 0.027              |                |
| PC 32:2         | LCMS (HR)  | 729.5315     | 0.0025                               | 0.015   | 0.003                | 0.011            |                  |                    |                |
| PC 34:5         | LCMS (HR)  | 751.5141     | 0.0024                               | 0.015   | 0.003                | 0.017            |                  |                    |                |
| PC 36:2         | LCMS (HR)  | 785.5950     | 0.0095                               | 0.035   |                      | 0.020            | 0.013            |                    |                |
| PC 36:1         | LCMS (HR)  | 787.6070     | 0.0106                               | 0.038   |                      | 0.009            |                  |                    |                |
| PC 38:2         | LCMS (HR)  | 813.6253     | 0.0056                               | 0.029   | 0.049                | 0.008            | 0.013            |                    |                |
| PC 40:4         | LCMS (HR)  | 837.6184     | 0.0063                               | 0.030   |                      | 0.019            | 0.007            |                    |                |
| LPC 20:4        | LCMS (HR)  | 543.3303     | 0.0022                               | 0.014   |                      | 0.002            |                  |                    | 0.019          |
| SM 40:2;O2      | LCMS (HR)  | 784.6493     | 0.0053                               | 0.029   |                      |                  |                  | 0.007              | 0.013          |
| SM 44:1;O2      | LCMS (HR)  | 842.7179     | 0.0066                               | 0.030   | 0.030                | 0.012            |                  |                    |                |
| PE 32:2         | LCMS (HR)  | 687.4836     | 0.0000                               | 0.000   | 0.000                | 0.000            | 0.000            |                    |                |
| PE 32:1         | LCMS (HR)  | 689.4989     | 0.0124                               | 0.043   | 0.037                |                  | 0.016            |                    |                |
| PE 34:3         | LCMS (HR)  | 713.4995     | 0.0020                               | 0.013   | 0.002                | 0.012            | 0.024            |                    |                |
| PE O-38:3       | LCMS (HR)  | 755.5821     | 0.0061                               | 0.030   |                      |                  | 0.013            | 0.010              | 0.048          |

| Compound        | FC (abs) ([Th2] vs [V]) | Regulation | FC (abs) ([Th2+T] vs [V]) | Regulation | FC (abs) ([T] vs [V]) | Regulation |
|-----------------|-------------------------|------------|---------------------------|------------|-----------------------|------------|
| FA 16:1n-7      | 2.098                   | down       | 1.045                     | up         | 1.034                 | up         |
| FA 27:0         | 2.229                   | down       | 1.839                     | down       | 1.316                 | down       |
| FA 29:0         | 2.126                   | down       | 2.061                     | down       | 1.171                 | down       |
| FA 30:0         | 1.953                   | down       | 1.565                     | down       | 1.422                 | down       |
| Sterol-like 458 | 1.089                   | up         | 1.183                     | down       | 1.311                 | down       |
| Sterol-like 498 | 1.120                   | down       | 1.919                     | up         | 1.546                 | up         |
| HexCer 42:1;O2  | 1.505                   | down       | 1.558                     | down       | 1.574                 | down       |
| HexCer 44:1;O2  | 1.657                   | down       | 1.755                     | down       | 1.920                 | down       |
| HexCer 48:2;O2  | 1.964                   | down       | 1.113                     | down       | 1.166                 | down       |
| Cer[NH]40:1     | 1.004                   | down       | 1.381                     | up         | 1.466                 | up         |
| TG 44:2         | 1.246                   | down       | 1.488                     | up         | 1.461                 | up         |
| TG 46:3         | 1.427                   | down       | 1.689                     | up         | 1.569                 | up         |
| TG 46:2         | 1.337                   | down       | 1.784                     | up         | 1.650                 | up         |
| TG 46:1         | 1.301                   | down       | 1.410                     | up         | 1.328                 | up         |
| TG 48:4         | 1.367                   | down       | 1.507                     | up         | 1.365                 | up         |
| TG 48:3         | 1.743                   | down       | 1.985                     | up         | 1.815                 | up         |
| TG 48:2         | 1.507                   | down       | 1.712                     | up         | 1.534                 | up         |
| TG 48:1         | 1.387                   | down       | 1.254                     | up         | 1.169                 | up         |
| TG 48:0         | 1.419                   | down       | 1.169                     | down       | 1.246                 | down       |
| TG 50:5         | 1.359                   | down       | 1.477                     | up         | 1.291                 | up         |
| TG 50:4         | 1.428                   | down       | 1.817                     | up         | 1.635                 | up         |
| TG 50:3         | 1.720                   | down       | 1.933                     | up         | 1.672                 | up         |
| TG 50:2         | 1.463                   | down       | 1.430                     | up         | 1.292                 | up         |
| TG 51:2         | 1.548                   | down       | 1.190                     | up         | 1.016                 | down       |
| TG 52:5         | 1.283                   | down       | 1.788                     | up         | 1.491                 | up         |
| TG 52:4         | 1.265                   | down       | 1.789                     | up         | 1.542                 | up         |
| TG 52:3         | 1.442                   | down       | 1.674                     | up         | 1.443                 | up         |
| TG 53:3         | 1.396                   | down       | 1.186                     | up         | 1.083                 | up         |
| TG 54:4         | 1.090                   | down       | 1.538                     | up         | 1.356                 | up         |
| DG 34:0         | 2.502                   | down       | 2.553                     | down       | 2.253                 | down       |
| DG 34:2         | 1.225                   | down       | 1.095                     | up         | 1.002                 | up         |
| DG 35:0         | 2.765                   | down       | 2.663                     | down       | 2.265                 | down       |
| DG 36:1         | 1.174                   | up         | 1.304                     | down       | 1.424                 | down       |
| DG 37:0         | 2.623                   | down       | 2.727                     | down       | 2.157                 | down       |
| DG 38:0         | 3.331                   | down       | 2.982                     | down       | 2.495                 | down       |
| DG 38:1         | 1.085                   | up         | 1.180                     | down       | 1.338                 | down       |
| DG 38:2         | 1.091                   | up         | 1.172                     | down       | 1.188                 | down       |
| DG 40:0         | 3.046                   | down       | 2.729                     | down       | 2.335                 | down       |
| PC 32:2         | 1.430                   | down       | 1.382                     | up         | 1.247                 | up         |
| PC 34:5         | 1.343                   | down       | 1.681                     | up         | 1.440                 | up         |
| PC 36:2         | 1.558                   | up         | 1.121                     | up         | 1.026                 | up         |
| PC 36:1         | 1.422                   | up         | 1.006                     | down       | 1.132                 | down       |
| PC 38:2         | 1.537                   | up         | 1.081                     | up         | 1.025                 | down       |
| PC 40:4         | 1.376                   | up         | 1.171                     | up         | 1.038                 | up         |
| LPC 20:4        | 1.143                   | up         | 1.271                     | down       | 1.587                 | down       |
| SM 40:2;O2      | 1.246                   | up         | 1.438                     | up         | 1.398                 | up         |
| SM 44:1;O2      | 1.094                   | up         | 1.193                     | down       | 1.240                 | down       |
| PE 32:2         | 2.467                   | down       | 1.054                     | up         | 1.023                 | up         |
| PE 32:1         | 1.512                   | down       | 1.051                     | down       | 1.077                 | down       |
| PE 34:3         | 1.497                   | down       | 1.156                     | up         | 1.041                 | up         |
| PE O-38:3       | 1.490                   | up         | 1.514                     | up         | 1.388                 | up         |

**Table S4.** Abundance profiles of FAs, Sterol-like, HexCers, TGs, DGs, PCs, SMs, Pes in HEEs treated with tofacitinib and Th2 cytokines and their combination. q-values, p-values and fold changes (FC) of 51 significant lipid species obtained after one-way ANOVA (V= vehicle; T= tofacitinib).

| Variable       | V      | T      | Th2    | Th2+T  | SD V   | SD T   | SD Th2 | SD Th2+T | FC Th2/V | FC Th2+T/Th2 | Kruskal-Wallis |
|----------------|--------|--------|--------|--------|--------|--------|--------|----------|----------|--------------|----------------|
| HexCer 34:1;O2 | 79.013 | 51.642 | 44.198 | 50.746 | 52.933 | 16.660 | 13.460 | 14.488   | 0.559    | 0.983        | 0.497          |
| HexCer 36:1;O2 | 33.712 | 14.759 | 16.055 | 12.733 | 51.408 | 15.075 | 17.516 | 12.974   | 0.476    | 0.863        | 0.668          |
| HexCer 38:1;O2 | 17.115 | 9.819  | 11.283 | 11.644 | 8.734  | 4.457  | 3.687  | 5.754    | 0.659    | 1.186        | 0.267          |
| HexCer 40:1;O2 | 35.077 | 21.850 | 28.692 | 26.606 | 6.056  | 7.151  | 6.028  | 4.312    | 0.818    | 1.218        | <b>0.025</b>   |
| HexCer 42:1;O2 | 93.709 | 59.554 | 61.659 | 60.280 | 20.258 | 11.331 | 8.097  | 12.543   | 0.658    | 1.012        | <b>0.005</b>   |
| HexCer 44:1;O2 | 55.407 | 26.880 | 32.056 | 29.213 | 32.243 | 10.529 | 14.840 | 10.094   | 0.579    | 1.087        | 0.078          |
| HexCer 46:1;O2 | 12.064 | 5.915  | 7.430  | 6.153  | 3.889  | 2.399  | 1.431  | 2.612    | 0.616    | 1.040        | <b>0.012</b>   |
| HexCer 40:2;O2 | 4.355  | 3.736  | 2.633  | 3.863  | 1.752  | 1.476  | 0.723  | 1.355    | 0.605    | 1.034        | 0.296          |
| HexCer 42:2;O2 | 19.130 | 13.290 | 9.507  | 12.868 | 9.409  | 3.526  | 3.106  | 5.081    | 0.497    | 0.968        | 0.176          |
| HexCer 44:2;O2 | 17.158 | 10.490 | 7.054  | 10.651 | 9.076  | 5.404  | 3.766  | 4.684    | 0.411    | 1.015        | 0.113          |
| HexCer 46:2;O2 | 10.694 | 6.295  | 4.162  | 5.739  | 7.360  | 5.088  | 3.329  | 4.162    | 0.389    | 0.912        | 0.174          |
| HexCer 46:1;O2 | 12.064 | 5.915  | 7.430  | 6.153  | 3.889  | 2.399  | 1.431  | 2.612    | 0.616    | 1.040        | <b>0.012</b>   |

**Table S5.** Abundance profile of HexCers in HEEs treated with tofacitinib and Th2 cytokines and their combination. Mean values and standard deviation (SD) of amounts (pmol/mg protein) of HexCers and p-valued obtained after Kruskal-Wallis test (V= vehicle; T= tofacitinib).

| Variable        | V         | T         | Th2       | Th2+T     | SD V      | SD T      | SD Th2    | SD Th2+T  | FC<br>Th2/V | FC<br>Th2+T/<br>Th2 | Kruskal-<br>Wallis |
|-----------------|-----------|-----------|-----------|-----------|-----------|-----------|-----------|-----------|-------------|---------------------|--------------------|
| 12Me-C15:0      | 134.120   | 87.798    | 80.242    | 97.606    | 50.099    | 21.189    | 26.972    | 48.949    | 0.598       | 1.216               | 0.071              |
| 13Me-C15:0      | 99.972    | 68.128    | 63.521    | 79.203    | 33.887    | 14.897    | 20.403    | 38.144    | 0.635       | 1.247               | 0.079              |
| 14Me-C17:0      | 604.961   | 399.191   | 379.805   | 440.240   | 218.028   | 47.375    | 115.049   | 181.997   | 0.628       | 1.159               | <b>0.012</b>       |
| 15Me-C17:0      | 347.713   | 240.652   | 229.746   | 278.781   | 104.273   | 37.014    | 59.023    | 116.545   | 0.661       | 1.213               | 0.051              |
| FA 12:0         | 746.474   | 425.844   | 251.069   | 345.680   | 669.040   | 314.172   | 94.576    | 130.755   | 0.336       | 1.377               | 0.060              |
| FA 13:0         | 61.920    | 39.019    | 29.763    | 44.321    | 28.350    | 15.302    | 9.395     | 28.880    | 0.481       | 1.489               | <b>0.015</b>       |
| FA 14:0         | 4614.256  | 3249.785  | 2699.352  | 3571.032  | 1407.297  | 461.435   | 559.758   | 1393.404  | 0.585       | 1.323               | <b>0.002</b>       |
| FA 14:1         | 24.748    | 19.677    | 13.803    | 22.746    | 14.323    | 7.632     | 7.404     | 15.046    | 0.558       | 1.648               | 0.195              |
| FA 15:0         | 771.658   | 516.667   | 459.158   | 590.885   | 248.618   | 75.206    | 85.815    | 211.943   | 0.595       | 1.287               | <b>0.004</b>       |
| FA 16:0         | 57609.383 | 39020.630 | 37581.088 | 42919.251 | 28832.940 | 6709.082  | 7206.616  | 14368.278 | 0.652       | 1.142               | 0.060              |
| FA 16:1n-10     | 82.528    | 80.832    | 93.287    | 86.226    | 11.630    | 13.787    | 13.153    | 15.123    | 1.130       | 0.924               | 0.186              |
| FA 16:1n-7      | 1324.638  | 1421.656  | 607.980   | 1473.994  | 466.981   | 488.951   | 121.223   | 658.808   | 0.459       | 2.424               | <b>&lt;0.0001</b>  |
| FA 17:0         | 2042.903  | 1390.867  | 1354.314  | 1599.834  | 668.251   | 195.520   | 307.664   | 603.101   | 0.663       | 1.181               | 0.053              |
| FA 17:1         | 7073.464  | 4698.568  | 5634.488  | 5714.523  | 4176.796  | 2732.069  | 4477.394  | 4651.240  | 0.797       | 1.014               | 0.535              |
| FA 18:0         | 78785.285 | 51377.971 | 50595.111 | 55167.599 | 46859.494 | 10374.799 | 10109.213 | 17694.526 | 0.642       | 1.090               | 0.148              |
| FA 18:1n-9      | 5048.400  | 4482.580  | 4372.361  | 4791.400  | 1405.642  | 1406.185  | 1567.190  | 2041.068  | 0.866       | 1.096               | 0.782              |
| FA 18:1 (II)    | 4315.466  | 4016.429  | 4312.789  | 4383.628  | 1991.115  | 1960.945  | 2614.538  | 2770.871  | 0.999       | 1.016               | 0.972              |
| FA 18:2         | 112.784   | 100.204   | 94.456    | 111.899   | 21.380    | 21.722    | 9.356     | 18.749    | 0.837       | 1.185               | <b>0.049</b>       |
| FA 19:0         | 156.885   | 104.965   | 112.427   | 124.687   | 56.707    | 20.483    | 30.721    | 51.201    | 0.717       | 1.109               | 0.107              |
| FA 20:0         | 913.234   | 675.365   | 670.214   | 774.540   | 224.648   | 107.328   | 94.006    | 233.001   | 0.734       | 1.156               | <b>0.032</b>       |
| FA 20:1n-9      | 95.120    | 99.206    | 110.367   | 115.001   | 32.011    | 23.046    | 20.420    | 36.468    | 1.160       | 1.042               | 0.583              |
| FA 20:1 (II)    | 214.719   | 214.669   | 201.909   | 240.973   | 129.009   | 108.682   | 110.769   | 151.318   | 0.940       | 1.193               | 0.936              |
| FA 22:0         | 190.982   | 156.318   | 144.019   | 179.501   | 58.765    | 36.965    | 36.526    | 55.562    | 0.754       | 1.246               | 0.190              |
| FA 24:0         | 335.140   | 331.402   | 313.659   | 356.055   | 144.769   | 68.861    | 66.704    | 80.639    | 0.936       | 1.135               | 0.591              |
| FA 24:1         | 29.063    | 31.944    | 31.600    | 33.897    | 20.159    | 16.277    | 20.905    | 15.798    | 1.087       | 1.073               | 0.889              |
| FA 26:0         | 156.473   | 158.371   | 144.473   | 175.473   | 94.857    | 68.117    | 50.555    | 53.186    | 0.923       | 1.215               | 0.705              |
| FA 27:0         | 164.838   | 120.719   | 72.652    | 90.891    | 52.881    | 26.180    | 21.196    | 36.599    | 0.441       | 1.251               | <b>&lt;0.0001</b>  |
| FA 28:0         | 808.332   | 639.140   | 562.844   | 604.151   | 335.814   | 281.797   | 304.665   | 297.498   | 0.696       | 1.073               | 0.121              |
| FA 29:0         | 49.100    | 39.965    | 20.905    | 21.434    | 24.326    | 18.487    | 6.059     | 5.697     | 0.426       | 1.025               | <b>0.000</b>       |
| FA 30:0         | 143.497   | 101.409   | 76.031    | 101.650   | 27.063    | 22.282    | 24.535    | 55.565    | 0.530       | 1.337               | <b>0.000</b>       |
| FOH 16:0        | 64.286    | 42.821    | 39.126    | 42.448    | 24.773    | 11.720    | 14.048    | 14.838    | 0.609       | 1.085               | 0.052              |
| FOH 18:0        | 723.319   | 523.187   | 539.635   | 413.343   | 273.845   | 77.802    | 134.476   | 54.287    | 0.746       | 0.766               | <b>0.000</b>       |
| FOH 17:1        | 128.305   | 123.237   | 74.699    | 124.253   | 41.077    | 43.838    | 14.942    | 69.996    | 0.582       | 1.663               | <b>0.015</b>       |
| Cholesterol     | 37497.070 | 34373.354 | 32843.825 | 35193.946 | 2615.163  | 4651.090  | 4214.859  | 5189.979  | 0.876       | 1.072               | 0.089              |
| Sterol-like 458 | 856.041   | 682.010   | 924.804   | 750.019   | 231.427   | 187.419   | 121.773   | 169.203   | 1.080       | 0.811               | <b>0.012</b>       |
| Sterol-like 486 | 22.627    | 19.929    | 22.829    | 23.364    | 11.482    | 8.011     | 5.705     | 9.302     | 1.009       | 1.023               | 0.683              |
| Sterol-like 498 | 965.622   | 1535.763  | 855.508   | 1933.638  | 267.166   | 362.499   | 137.342   | 509.651   | 0.886       | 2.260               | <b>&lt;0.0001</b>  |
| Sterol-like 500 | 2521.194  | 2332.211  | 1869.067  | 2623.533  | 696.018   | 461.251   | 96.054    | 565.419   | 0.741       | 1.404               | <b>0.002</b>       |
| Sterol-like 520 | 1719.558  | 1872.025  | 703.946   | 2299.893  | 1362.577  | 1517.390  | 762.844   | 2173.004  | 0.409       | 3.267               | 0.072              |

**Table S6.** Abundance profile of FFAs, FOHs, cholesterol, and related metabolites in HEEs treated with tofacitinib and Th2 cytokines and their combination. Mean values and standard deviation (SD) of amounts (pmol/mg protein) of FFAs, FOHs, cholesterol, and related metabolites and p-valued obtained after Kruskal-Wallis test (V= vehicle; T= tofacitinib).

| Variable | V         | T        | Th2      | Th2+T    | SD V     | SD T     | SD Th2   | SD Th2+T | FC Th2/V | FC Th2+T/Th2 | Kruskal-Wallis |
|----------|-----------|----------|----------|----------|----------|----------|----------|----------|----------|--------------|----------------|
| DG 28:0  | 19.683    | 10.759   | 17.689   | 14.424   | 12.026   | 5.390    | 11.821   | 9.271    | 0.899    | 0.815        | 0.451          |
| DG 29:0  | 23.762    | 25.662   | 18.568   | 16.748   | 9.798    | 25.075   | 12.616   | 13.075   | 0.781    | 0.902        | 0.695          |
| DG 30:0  | 46.069    | 36.022   | 42.880   | 35.864   | 19.041   | 11.605   | 18.774   | 16.274   | 0.931    | 0.836        | 0.685          |
| DG 30:1  | 38.240    | 36.252   | 29.614   | 37.579   | 6.956    | 6.656    | 6.104    | 3.481    | 0.774    | 1.269        | 0.114          |
| DG 31:0  | 42.771    | 25.468   | 30.272   | 24.532   | 30.330   | 7.384    | 9.166    | 5.251    | 0.708    | 0.810        | 0.480          |
| DG 32:0  | 333.420   | 181.093  | 197.919  | 171.760  | 135.292  | 31.072   | 59.545   | 44.963   | 0.594    | 0.868        | <b>0.023</b>   |
| DG 32:1  | 135.598   | 123.472  | 108.219  | 119.027  | 32.500   | 13.641   | 6.248    | 14.216   | 0.798    | 1.100        | <b>0.046</b>   |
| DG 32:2  | 120.121   | 85.260   | 69.163   | 84.411   | 51.033   | 7.605    | 17.491   | 16.011   | 0.576    | 1.220        | <b>0.047</b>   |
| DG 33:0  | 35.990    | 17.165   | 18.095   | 16.055   | 16.333   | 6.428    | 4.952    | 3.339    | 0.503    | 0.887        | <b>0.012</b>   |
| DG 33:1  | 7.155     | 3.915    | 4.339    | 4.715    | 4.350    | 1.229    | 1.550    | 1.213    | 0.606    | 1.087        | 0.397          |
| DG 34:0  | 5134.489  | 2102.854 | 1881.575 | 1810.608 | 2990.608 | 629.909  | 504.398  | 346.880  | 0.366    | 0.962        | <b>0.006</b>   |
| DG 34:1  | 244.192   | 186.523  | 221.503  | 199.851  | 57.286   | 23.834   | 39.157   | 37.926   | 0.907    | 0.902        | 0.191          |
| DG 34:2  | 268.442   | 270.079  | 218.899  | 293.857  | 21.410   | 33.969   | 13.325   | 23.741   | 0.815    | 1.342        | <b>0.003</b>   |
| DG 34:3  | 16.132    | 12.120   | 14.102   | 13.384   | 5.865    | 5.082    | 6.448    | 4.271    | 0.874    | 0.949        | 0.718          |
| DG 35:0  | 110.479   | 44.691   | 36.214   | 36.949   | 67.523   | 13.943   | 9.703    | 6.878    | 0.328    | 1.020        | <b>0.004</b>   |
| DG 36:0  | 12903.171 | 4684.880 | 5277.373 | 5095.372 | 7720.221 | 2721.892 | 1505.703 | 1097.572 | 0.409    | 0.966        | <b>0.014</b>   |
| DG 36:1  | 192.721   | 135.049  | 226.648  | 147.441  | 16.564   | 7.085    | 23.803   | 6.563    | 1.176    | 0.651        | <b>0.000</b>   |
| DG 36:2  | 248.603   | 230.415  | 276.973  | 229.306  | 35.664   | 44.886   | 40.916   | 25.512   | 1.114    | 0.828        | 0.183          |
| DG 36:3  | 35.810    | 33.380   | 34.033   | 32.766   | 12.245   | 10.140   | 4.509    | 3.563    | 0.950    | 0.963        | 0.950          |
| DG 37:0  | 32.607    | 13.647   | 11.495   | 10.630   | 20.477   | 3.939    | 4.306    | 2.087    | 0.353    | 0.925        | <b>0.004</b>   |
| DG 38:0  | 213.974   | 75.161   | 54.717   | 60.469   | 161.387  | 28.100   | 13.727   | 12.436   | 0.256    | 1.105        | <b>0.004</b>   |
| DG 38:1  | 28.342    | 21.253   | 31.180   | 24.289   | 1.168    | 1.994    | 5.941    | 4.200    | 1.100    | 0.779        | <b>0.007</b>   |
| DG 38:2  | 48.003    | 40.961   | 52.933   | 41.288   | 5.014    | 8.388    | 10.332   | 7.141    | 1.103    | 0.780        | 0.122          |
| DG 39:0  | 17.907    | 8.552    | 8.423    | 8.094    | 10.540   | 3.030    | 1.971    | 2.531    | 0.470    | 0.961        | <b>0.031</b>   |
| DG 40:0  | 94.742    | 35.370   | 26.530   | 29.253   | 69.975   | 11.874   | 6.213    | 4.936    | 0.280    | 1.103        | <b>0.004</b>   |
| DG 40:1  | 5.090     | 4.772    | 3.014    | 3.393    | 0.936    | 3.364    | 0.712    | 0.985    | 0.592    | 1.126        | <b>0.039</b>   |

**Table S7.** Abundance profile of the detected DGs in HEEs treated with tofacitinib and Th2 cytokines and their combination. Mean values and standard deviation (SD) of DGs amounts (pmol/mg protein) and p-values obtained after Kruskal-Wallis test (V= vehicle; T= tofacitinib).

| Variable          | V        | T        | Th2      | Th2+T    | SD V     | SD T     | SD Th2  | SD Th2+T | FC Th2/V | FC Th2+T/Th2 | Kruskal-Wallis |
|-------------------|----------|----------|----------|----------|----------|----------|---------|----------|----------|--------------|----------------|
| <b>LPC 16:1</b>   | 658.521  | 393.146  | 591.994  | 504.143  | 313.448  | 153.622  | 244.057 | 187.436  | 0.899    | 0.852        | 0.323          |
| <b>LPC 18:1</b>   | 1003.224 | 638.477  | 1135.754 | 756.751  | 543.617  | 314.724  | 419.736 | 252.621  | 1.132    | 0.666        | 0.264          |
| <b>LPC 20:4</b>   | 228.984  | 147.839  | 232.135  | 194.487  | 76.333   | 40.801   | 77.545  | 75.187   | 1.014    | 0.838        | 0.151          |
|                   |          |          |          |          |          |          |         |          |          |              |                |
| Variable          | V        | T        | Th2      | Th2+T    | SD V     | SD T     | SD Th2  | SD Th2+T | FC Th2/V | FC Th2+T/Th2 | Kruskal-Wallis |
| <b>SM 32:1;O2</b> | 507.252  | 606.776  | 472.607  | 638.588  | 213.789  | 227.562  | 68.099  | 246.319  | 0.932    | 1.351        | 0.355          |
| <b>SM 34:1;O2</b> | 3838.108 | 4258.493 | 4101.612 | 4491.207 | 1276.181 | 1525.192 | 371.994 | 1410.462 | 1.069    | 1.095        | 0.907          |
| <b>SM 38:1;O2</b> | 356.317  | 306.801  | 321.436  | 347.154  | 55.476   | 57.013   | 26.778  | 53.739   | 0.902    | 1.080        | 0.312          |
| <b>SM 40:2;O2</b> | 168.522  | 236.503  | 205.987  | 243.977  | 45.734   | 62.899   | 35.886  | 77.555   | 1.222    | 1.184        | 0.114          |
| <b>SM 40:1;O2</b> | 321.262  | 330.667  | 369.799  | 339.093  | 44.833   | 63.442   | 63.445  | 87.168   | 1.151    | 0.917        | 0.608          |
| <b>SM 42:2;O2</b> | 535.778  | 684.000  | 500.797  | 579.418  | 172.224  | 206.848  | 93.556  | 201.226  | 0.935    | 1.157        | 0.479          |
| <b>SM 42:1;O2</b> | 476.606  | 411.638  | 528.218  | 488.355  | 106.666  | 129.964  | 105.510 | 197.125  | 1.108    | 0.925        | 0.397          |
| <b>SM 44:2;O2</b> | 259.032  | 288.910  | 253.861  | 310.999  | 79.636   | 87.126   | 84.472  | 136.553  | 0.980    | 1.225        | 0.838          |
| <b>SM 44:1;O2</b> | 220.649  | 177.949  | 240.265  | 194.015  | 66.722   | 54.477   | 70.120  | 91.500   | 1.089    | 0.808        | 0.518          |

**Table S8.** LPCs and SMs abundance in HEEs treated with tofacitinib and Th2 cytokines and their combination. Mean values and standard deviation (SD) of LPCs and SMs amounts (pmol/mg protein) and p-values obtained after Kruskal-Wallis test (V= vehicle; T= tofacitinib).



| Variable | V        | T        | Th2      | Th2+T    | SD V     | SD T    | SD Th2  | SD Th2+T | FC Th2/V | FC Th2+T/Th2 | Kruskal-Wallis |
|----------|----------|----------|----------|----------|----------|---------|---------|----------|----------|--------------|----------------|
| PC 28:0  | 72.556   | 86.635   | 64.414   | 86.690   | 25.869   | 21.638  | 2.958   | 15.349   | 0.888    | 1.346        | 0.121          |
| PC 30:1  | 363.036  | 414.532  | 270.569  | 441.088  | 111.126  | 97.212  | 26.768  | 62.598   | 0.745    | 1.630        | <b>0.025</b>   |
| PC 30:0  | 429.872  | 480.167  | 406.527  | 493.309  | 150.149  | 116.436 | 45.342  | 76.664   | 0.946    | 1.213        | 0.242          |
| PC 32:3  | 54.340   | 69.492   | 48.518   | 67.028   | 23.087   | 19.537  | 9.453   | 15.533   | 0.893    | 1.382        | 0.120          |
| PC 32:2  | 593.076  | 733.282  | 403.813  | 798.889  | 160.393  | 175.175 | 58.762  | 122.110  | 0.681    | 1.978        | <b>0.004</b>   |
| PC 32:1  | 2279.819 | 2459.669 | 2221.289 | 2646.048 | 674.509  | 623.356 | 187.683 | 353.756  | 0.974    | 1.191        | 0.375          |
| PC 32:0  | 669.581  | 692.197  | 627.625  | 743.045  | 172.967  | 148.260 | 59.016  | 77.236   | 0.937    | 1.184        | 0.295          |
| PC 34:5  | 56.899   | 80.608   | 39.832   | 88.712   | 24.669   | 31.503  | 11.638  | 21.988   | 0.700    | 2.227        | <b>0.017</b>   |
| PC 34:4  | 205.033  | 264.787  | 200.554  | 283.490  | 101.124  | 99.151  | 51.715  | 63.304   | 0.978    | 1.414        | 0.193          |
| PC 34:3  | 190.221  | 236.385  | 195.964  | 263.818  | 56.823   | 59.583  | 31.520  | 42.841   | 1.030    | 1.346        | 0.083          |
| PC 34:2  | 3046.460 | 3357.770 | 3045.855 | 3649.991 | 816.785  | 804.729 | 229.870 | 479.498  | 1.000    | 1.198        | 0.203          |
| PC 34:1  | 3923.240 | 3909.379 | 5305.062 | 4176.788 | 1020.698 | 862.900 | 216.771 | 469.748  | 1.352    | 0.787        | <b>0.005</b>   |
| PC 36:6  | 37.791   | 52.499   | 44.445   | 55.506   | 21.403   | 20.902  | 21.371  | 14.353   | 1.176    | 1.249        | 0.365          |
| PC 36:5  | 266.085  | 353.449  | 284.163  | 389.565  | 130.059  | 139.674 | 82.862  | 96.329   | 1.068    | 1.371        | 0.256          |
| PC 36:4  | 364.474  | 439.612  | 538.063  | 481.705  | 171.394  | 157.303 | 163.863 | 103.527  | 1.476    | 0.895        | 0.355          |
| PC 36:3  | 341.978  | 404.727  | 550.746  | 466.697  | 83.106   | 99.921  | 141.608 | 107.146  | 1.610    | 0.847        | 0.058          |
| PC 36:2  | 3798.176 | 3865.215 | 5740.706 | 4151.404 | 965.132  | 856.386 | 299.921 | 497.056  | 1.511    | 0.723        | <b>0.004</b>   |
| PC 36:1  | 1118.534 | 974.054  | 1547.321 | 1084.716 | 287.142  | 184.354 | 140.640 | 133.281  | 1.383    | 0.701        | <b>0.003</b>   |
| PC 38:6  | 43.200   | 58.933   | 69.472   | 66.818   | 16.742   | 19.063  | 23.444  | 13.557   | 1.608    | 0.962        | 0.133          |
| PC 38:5  | 297.971  | 356.849  | 500.127  | 388.550  | 135.120  | 124.846 | 161.422 | 82.875   | 1.678    | 0.777        | 0.199          |
| PC 38:4  | 108.636  | 116.699  | 161.701  | 127.605  | 42.696   | 34.386  | 46.264  | 26.909   | 1.488    | 0.789        | 0.207          |
| PC 38:3  | 69.938   | 75.001   | 103.151  | 87.734   | 15.704   | 13.277  | 14.854  | 10.498   | 1.475    | 0.851        | <b>0.010</b>   |
| PC 38:2  | 512.442  | 495.778  | 766.097  | 540.655  | 130.654  | 112.935 | 78.390  | 73.817   | 1.495    | 0.706        | <b>0.004</b>   |
| PC 38:1  | 104.608  | 91.907   | 134.592  | 101.430  | 23.309   | 16.136  | 12.891  | 13.059   | 1.287    | 0.754        | <b>0.005</b>   |
| PC 40:5  | 43.385   | 49.675   | 61.669   | 53.913   | 17.705   | 16.876  | 22.417  | 11.251   | 1.421    | 0.874        | 0.409          |
| PC 40:4  | 11.331   | 11.706   | 15.534   | 12.921   | 3.309    | 3.046   | 4.386   | 2.348    | 1.371    | 0.832        | 0.276          |
| PC 40:2  | 59.926   | 57.750   | 70.858   | 62.568   | 12.587   | 9.610   | 8.940   | 6.624    | 1.182    | 0.883        | 0.203          |
| PC 40:1  | 32.911   | 24.547   | 26.969   | 28.065   | 6.006    | 3.373   | 3.886   | 4.202    | 0.819    | 1.041        | 0.124          |

| Species | Formula    | Number | Number | Molecular Species |
|---------|------------|--------|--------|-------------------|
| PC 30:1 | C38H74NO8P | 30     | 1      | PC(14:0_16:1)     |
| PC 32:2 | C40H76NO8P | 32     | 2      | PC(16:1_16:1)     |
| PC 34:1 | C42H82NO8P | 34     | 1      | PC(16:0_18:1)     |
| PC 36:1 | C44H86NO8P | 36     | 1      | PC(18:0_18:1)     |
| PC 36:2 | C44H84NO8P | 36     | 2      | PC(18:1_18:1)     |
| PC 38:1 | C46H90NO8P | 38     | 1      | PC(18:0_20:1)     |
| PC 38:2 | C46H88NO8P | 38     | 2      | PC(18:1_20:1)     |
| PC 38:3 | C46H86NO8P | 38     | 3      | PC(18:2_20:1)     |

**Table S9.** Abundance of PCs members and molecular species characterized for candidate PCs in HEEs treated with tofacitinib and Th2 cytokines and their combination. Mean values and standard deviation (SD) of PCs amounts (pmol/mg protein) and p-values obtained after Kruskal-Wallis test and molecular species characterized for candidate PCs (V= vehicle; T= tofacitinib).

| Variable | V        | T        | Th2      | Th2+T    | SD V     | SD T     | SD Th2   | SD Th2+T | FC Th2/V | FC Th2+T/Th2 | Kruskal-Wallis |
|----------|----------|----------|----------|----------|----------|----------|----------|----------|----------|--------------|----------------|
| PE 32:2  | 136.331  | 141.254  | 48.576   | 138.623  | 74.145   | 78.738   | 13.255   | 72.493   | 0.356    | 2.854        | <b>0.048</b>   |
| PE 32:1  | 386.007  | 365.716  | 234.543  | 362.082  | 177.739  | 175.920  | 52.979   | 168.272  | 0.608    | 1.544        | 0.376          |
| PE 34:3  | 58.063   | 60.935   | 37.100   | 65.857   | 20.145   | 21.215   | 6.588    | 19.362   | 0.639    | 1.775        | 0.073          |
| PE 34:2  | 1635.223 | 1709.511 | 1051.920 | 1688.017 | 766.121  | 857.251  | 235.204  | 814.253  | 0.643    | 1.605        | 0.442          |
| PE 34:1  | 1622.136 | 1572.856 | 1436.696 | 1531.582 | 629.022  | 677.531  | 370.660  | 653.183  | 0.886    | 1.066        | 0.955          |
| PE 36:4  | 37.618   | 40.812   | 38.209   | 44.249   | 15.762   | 12.011   | 13.344   | 9.335    | 1.016    | 1.158        | 0.821          |
| PE 36:3  | 442.157  | 496.093  | 488.639  | 520.844  | 116.383  | 134.168  | 105.301  | 100.491  | 1.105    | 1.066        | 0.685          |
| PE 36:2  | 4923.203 | 5511.188 | 5826.972 | 5355.556 | 1983.609 | 2593.998 | 1921.428 | 2438.002 | 1.184    | 0.919        | 0.848          |
| PE 36:1  | 1177.716 | 1108.873 | 1345.298 | 1143.576 | 322.841  | 390.566  | 407.357  | 404.933  | 1.142    | 0.850        | 0.790          |
| PE 38:5  | 19.024   | 19.804   | 18.182   | 20.983   | 16.098   | 7.666    | 5.966    | 6.180    | 0.956    | 1.154        | 0.769          |
| PE 38:3  | 82.499   | 99.191   | 93.873   | 103.175  | 22.506   | 29.011   | 21.060   | 27.634   | 1.138    | 1.099        | 0.579          |
| PE 38:2  | 483.570  | 549.925  | 657.929  | 561.450  | 126.688  | 183.863  | 225.836  | 175.020  | 1.361    | 0.853        | 0.584          |
| PE 40:2  | 69.100   | 84.486   | 86.385   | 79.654   | 13.343   | 21.622   | 27.084   | 21.124   | 1.250    | 0.922        | 0.420          |
| PE 40:1  | 20.373   | 19.921   | 21.843   | 19.713   | 6.942    | 5.495    | 5.865    | 3.847    | 1.072    | 0.902        | 0.919          |

| Variable  | V        | T        | Th2      | Th2+T    | SD V    | SD T    | SD Th2  | SD Th2+T | FC Th2/V | FC Th2+T/Th2 | Kruskal-Wallis |
|-----------|----------|----------|----------|----------|---------|---------|---------|----------|----------|--------------|----------------|
| PE O-34:4 | 30.288   | 32.303   | 26.714   | 35.276   | 13.903  | 10.672  | 5.534   | 5.935    | 0.882    | 1.321        | 0.375          |
| PE O-34:3 | 882.260  | 946.209  | 731.467  | 1011.629 | 345.067 | 347.086 | 48.389  | 259.461  | 0.829    | 1.383        | 0.228          |
| PE O-34:2 | 1608.800 | 1679.021 | 1731.419 | 1779.729 | 496.662 | 541.434 | 222.958 | 372.096  | 1.076    | 1.028        | 0.932          |
| PE O-36:5 | 55.179   | 65.169   | 66.160   | 72.281   | 22.172  | 21.647  | 14.750  | 10.768   | 1.199    | 1.093        | 0.475          |
| PE O-36:4 | 293.463  | 334.247  | 311.473  | 375.397  | 88.333  | 103.506 | 60.905  | 55.429   | 1.061    | 1.205        | 0.279          |
| PE O-36:3 | 1815.346 | 2012.523 | 2210.712 | 2182.253 | 647.743 | 699.689 | 331.716 | 526.381  | 1.218    | 0.987        | 0.685          |
| PE O-36:2 | 402.089  | 442.459  | 492.919  | 486.941  | 130.687 | 132.665 | 87.795  | 98.500   | 1.226    | 0.988        | 0.720          |
| PE O-38:6 | 71.383   | 93.333   | 97.183   | 101.250  | 27.382  | 29.625  | 18.969  | 15.247   | 1.361    | 1.042        | 0.230          |
| PE O-38:5 | 42.491   | 56.086   | 59.543   | 61.133   | 17.956  | 16.751  | 9.671   | 10.867   | 1.401    | 1.027        | 0.259          |
| PE O-38:4 | 32.836   | 46.141   | 41.351   | 48.162   | 15.191  | 15.984  | 6.990   | 11.323   | 1.259    | 1.165        | 0.205          |
| PE O-38:3 | 183.085  | 252.795  | 261.801  | 267.557  | 67.569  | 78.312  | 60.071  | 66.015   | 1.430    | 1.022        | 0.207          |
| PE O-38:2 | 58.137   | 77.476   | 67.174   | 78.248   | 20.645  | 21.289  | 15.818  | 14.715   | 1.155    | 1.165        | 0.224          |

| Variable | V      | T      | Th2    | T+Th2  | SD V   | SD T  | SD Th2 | SD T+Th2 | FC Th2/V | FC T+Th2/Th2 | Kruskal-Wallis |
|----------|--------|--------|--------|--------|--------|-------|--------|----------|----------|--------------|----------------|
| PG 36:1  | 28.154 | 27.109 | 41.272 | 28.960 | 13.660 | 7.092 | 14.600 | 4.796    | 1.466    | 0.702        | 0.215          |
| PG 36:2  | 27.284 | 24.915 | 30.874 | 22.146 | 15.414 | 9.088 | 9.630  | 8.792    | 1.132    | 0.717        | 0.511          |
| PG 34:1  | 45.986 | 8.446  | 58.005 | 46.309 | 18.460 | 5.209 | 12.912 | 8.762    | 1.261    | 0.798        | <b>0.031</b>   |

| Variable | V        | T        | Th2      | T+Th2    | SD V    | SD T    | SD Th2  | SD T+Th2 | FC Th2/V | FC T+Th2/Th2 | Kruskal-Wallis |
|----------|----------|----------|----------|----------|---------|---------|---------|----------|----------|--------------|----------------|
| PI 36:1  | 1335.418 | 1394.762 | 1628.428 | 1335.581 | 320.494 | 287.884 | 214.064 | 298.802  | 1.219    | 0.820        | 0.186          |
| PI 32:1  | 240.182  | 240.172  | 141.570  | 320.831  | 154.009 | 85.501  | 43.390  | 134.540  | 0.589    | 2.266        | 0.054          |
| PI 34:1  | 933.958  | 954.599  | 778.859  | 1169.714 | 317.045 | 242.225 | 113.643 | 247.805  | 0.834    | 1.502        | 0.057          |

**Table S10.** Abundance of PEs, PGs and PIs in HEEs treated with tofacitinib and Th2 cytokines and their combination. Mean values and standard deviation (SD) of PEs, PGs, PIs, amounts (pmol/mg protein) and p-values obtained after Kruskal-Wallis test (V= vehicle; T= tofacitinib).

| Variable | V        | T        | Th2      | SD V     | SD T     | SD Th2  | SD Th2+T | FC Th2/V | FC Th2+T/Th2 | Kruskal-Wallis |
|----------|----------|----------|----------|----------|----------|---------|----------|----------|--------------|----------------|
| TG 40:0  | 13.748   | 14.720   | 10.658   | 5.951    | 7.857    | 2.681   | 4.751    | 0.775    | 1.262        | 0.613          |
| TG 42:2  | 9.867    | 12.736   | 7.131    | 5.600    | 8.412    | 2.010   | 5.213    | 0.723    | 1.575        | 0.473          |
| TG 42:1  | 57.998   | 37.264   | 24.197   | 43.725   | 13.574   | 4.525   | 7.494    | 0.417    | 1.513        | <b>0.040</b>   |
| TG 42:0  | 18.266   | 17.486   | 14.011   | 5.855    | 5.440    | 3.142   | 3.329    | 0.767    | 1.237        | 0.226          |
| TG 43:0  | 27.150   | 11.997   | 11.772   | 22.872   | 6.252    | 6.313   | 2.940    | 0.434    | 1.122        | 0.468          |
| TG 44:3  | 14.380   | 16.023   | 11.722   | 4.081    | 1.992    | 3.915   | 3.524    | 0.815    | 1.467        | 0.126          |
| TG 44:2  | 35.698   | 52.843   | 27.822   | 12.057   | 19.053   | 4.742   | 11.444   | 0.779    | 1.869        | <b>0.008</b>   |
| TG 44:1  | 60.778   | 78.539   | 50.696   | 12.240   | 25.529   | 8.802   | 7.676    | 0.834    | 1.588        | <b>0.010</b>   |
| TG 44:0  | 38.939   | 38.488   | 29.873   | 15.168   | 11.546   | 7.720   | 13.035   | 0.767    | 1.285        | 0.408          |
| TG 46:3  | 32.585   | 51.101   | 21.845   | 12.772   | 19.162   | 3.239   | 8.540    | 0.670    | 2.413        | <b>0.002</b>   |
| TG 46:2  | 130.229  | 223.777  | 97.945   | 15.600   | 76.334   | 16.137  | 28.377   | 0.752    | 2.375        | <b>0.000</b>   |
| TG 46:1  | 208.646  | 280.080  | 157.249  | 47.533   | 71.372   | 18.609  | 45.746   | 0.754    | 1.842        | <b>0.003</b>   |
| TG 46:0  | 113.681  | 103.645  | 77.893   | 36.478   | 37.131   | 21.811  | 53.199   | 0.685    | 1.342        | 0.321          |
| TG 47:2  | 15.940   | 17.064   | 11.844   | 5.667    | 4.276    | 4.666   | 8.518    | 0.743    | 1.549        | 0.297          |
| TG 47:1  | 39.779   | 27.559   | 21.041   | 18.039   | 7.127    | 3.542   | 8.979    | 0.529    | 1.390        | <b>0.034</b>   |
| TG 47:0  | 36.949   | 28.546   | 23.547   | 14.962   | 9.276    | 6.920   | 9.838    | 0.637    | 1.155        | 0.373          |
| TG 48:4  | 13.035   | 17.687   | 9.357    | 3.815    | 4.800    | 1.894   | 3.157    | 0.718    | 2.045        | <b>0.004</b>   |
| TG 48:3  | 163.642  | 304.215  | 93.170   | 30.202   | 96.335   | 11.589  | 23.688   | 0.569    | 3.446        | <b>0.000</b>   |
| TG 48:2  | 614.596  | 949.387  | 396.236  | 158.423  | 262.426  | 41.255  | 119.700  | 0.645    | 2.583        | <b>0.001</b>   |
| TG 48:1  | 713.438  | 812.384  | 468.773  | 305.980  | 303.215  | 71.111  | 326.580  | 0.657    | 1.828        | 0.110          |
| TG 48:0  | 217.902  | 182.490  | 151.770  | 75.576   | 81.511   | 49.412  | 100.040  | 0.697    | 1.293        | 0.515          |
| TG 50:5  | 8.314    | 11.277   | 5.901    | 2.825    | 5.152    | 1.375   | 5.205    | 0.710    | 2.125        | 0.100          |
| TG 50:4  | 39.244   | 66.950   | 27.784   | 7.395    | 25.837   | 6.987   | 17.431   | 0.708    | 2.594        | <b>0.001</b>   |
| TG 50:3  | 736.315  | 1245.896 | 416.695  | 182.226  | 368.493  | 41.428  | 144.876  | 0.566    | 3.327        | <b>0.000</b>   |
| TG 50:2  | 2052.556 | 2583.343 | 1290.322 | 812.354  | 831.632  | 111.755 | 778.886  | 0.629    | 2.153        | <b>0.044</b>   |
| TG 50:1  | 1158.027 | 1150.781 | 821.328  | 602.823  | 551.641  | 234.794 | 678.343  | 0.709    | 1.497        | 0.613          |
| TG 52:5  | 21.787   | 33.597   | 17.051   | 8.526    | 16.679   | 6.932   | 16.403   | 0.783    | 2.299        | 0.065          |
| TG 52:4  | 114.888  | 182.596  | 92.695   | 17.781   | 57.145   | 24.018  | 39.399   | 0.807    | 2.229        | <b>0.001</b>   |
| TG 52:3  | 1932.404 | 2768.731 | 1265.879 | 637.924  | 827.802  | 65.009  | 561.282  | 0.655    | 2.444        | <b>0.002</b>   |
| TG 52:2  | 2717.757 | 3077.670 | 2036.677 | 1197.180 | 1167.842 | 336.002 | 1250.757 | 0.749    | 1.628        | 0.203          |
| TG 53:3  | 55.032   | 60.188   | 38.269   | 15.756   | 18.743   | 5.490   | 21.315   | 0.695    | 1.709        | <b>0.043</b>   |
| TG 54:6  | 94.428   | 86.898   | 87.496   | 30.510   | 19.656   | 9.057   | 10.106   | 0.927    | 1.097        | 0.539          |
| TG 54:5  | 53.341   | 59.791   | 46.122   | 25.237   | 26.025   | 13.419  | 19.826   | 0.865    | 1.446        | 0.551          |
| TG 54:4  | 169.073  | 235.225  | 157.913  | 24.163   | 64.167   | 35.872  | 25.168   | 0.934    | 1.640        | <b>0.006</b>   |
| TG 54:3  | 2110.295 | 2724.330 | 1742.479 | 746.298  | 834.777  | 149.647 | 666.291  | 0.826    | 1.626        | <b>0.031</b>   |

| Species | Formula     | Number | DBs | 1                  | 2                  | 3                  | 4                  | 5                  | 6                  |
|---------|-------------|--------|-----|--------------------|--------------------|--------------------|--------------------|--------------------|--------------------|
| TG 44:1 | C47 H88 O6  | 44     | 1   | TG(12:0_16:0_16:1) | TG(14:0_14:0_16:1) | TG(14:0_16:0_14:1) |                    |                    |                    |
| TG 46:1 | C49 H92 O6  | 46     | 1   | TG(12:0_16:0_18:1) | TG(14:0_16:0_16:1) | TG(15:0_16:0_15:1) |                    |                    |                    |
| TG 44:2 | C47 H86 O6  | 44     | 2   | TG(12:0_14:1_18:1) | TG(12:0_16:1_16:1) | TG(14:0_14:1_16:1) | TG(16:0_12:1_16:1) |                    |                    |
| TG 46:2 | C49 H90 O6  | 46     | 2   | TG(12:0_16:1_18:1) | TG(14:0_14:1_18:1) | TG(14:0_16:1_16:1) | TG(16:0_14:1_16:1) |                    |                    |
| TG 48:2 | C51 H94 O6  | 48     | 2   | TG(14:0_16:1_18:1) | TG(16:0_16:1_16:1) |                    |                    |                    |                    |
| TG 46:3 | C49 H88 O6  | 46     | 3   | TG(12:0_16:1_18:2) | TG(14:0_14:1_18:2) | TG(12:1_16:1_18:1) | TG(14:1_14:1_18:1) | TG(14:1_16:1_16:1) |                    |
| TG 48:3 | C51 H92 O6  | 48     | 3   | TG(14:0_16:1_18:2) | TG(16:0_14:1_18:2) | TG(16:0_16:1_16:2) | TG(14:1_16:1_18:1) | TG(16:1_16:1_16:1) |                    |
| TG 50:3 | C53 H96 O6  | 50     | 3   | TG(14:0_18:1_18:2) | TG(16:0_14:1_20:2) | TG(16:0_16:1_18:2) | TG(14:1_16:1_20:1) | TG(14:1_18:1_18:1) | TG(16:1_16:1_18:1) |
| TG 52:3 | C55 H100 O6 | 52     | 3   | TG(16:0_18:1_18:2) | TG(20:0_14:1_18:2) | TG(14:1_18:1_20:1) | TG(16:1_16:1_20:1) | TG(16:1_18:1_18:1) |                    |
| TG 50:4 | C53 H94 O6  | 50     | 4   | TG(14:0_18:2_18:2) | TG(16:0_16:1_18:3) | TG(16:1_16:1_18:2) |                    |                    |                    |
| TG 52:4 | C55 H98 O6  | 52     | 4   | TG(16:0_18:2_18:2) | TG(16:1_16:1_20:2) | TG(16:1_18:1_18:2) |                    |                    |                    |
| TG 54:4 | C57 H102 O6 | 54     | 4   | TG(16:1_18:1_20:2) | TG(18:1_18:1_18:2) |                    |                    |                    |                    |

**Table S11.** TGs amounts and molecular species characterized for candidates TGs in HEEs treated with tofacitinib and Th2 cytokines and their combination. Mean values and standard deviation (SD) of TGs amounts (pmol/mg protein) and p-values obtained after Kruskal-Wallis test and molecular species characterized for candidate TGs. The number of molecular species are reported from 1 to 6 (V= vehicle; T= tofacitinib; DBs = number of double bounds).

| Variable            | V        | T        | Th2      | Th2+T    | SD V     | SD T     | SD Th2+T | SD Th2   | FC Th2/V | FC Th2+T/Th2 | Kruskal-Wallis |
|---------------------|----------|----------|----------|----------|----------|----------|----------|----------|----------|--------------|----------------|
| Cholesterol Sulfate | 3650.722 | 3476.127 | 4601.769 | 3794.5   | 648.154  | 547.234  | 315.653  | 1029.698 | 1.261    | 0.825        | 0.227          |
|                     |          |          |          |          |          |          |          |          |          |              |                |
| Variable            | V        | T        | Th2      | Th2+T    | SD V     | SD T     | SD Th2   | SD Th2+T | FC Th2/V | FC Th2+T/Th2 | Kruskal-Wallis |
| Cer[NS]34:2         | 73.093   | 75.599   | 73.267   | 74.492   | 47.115   | 45.175   | 43.464   | 44.82    | 1.002    | 1.017        | 0.998          |
| Cer[NS]35:2         | 3.595    | 2.834    | 3.404    | 2.867    | 3.851    | 2.87     | 3.846    | 3.274    | 0.947    | 0.842        | 0.717          |
| Cer[NS]36:2         | 99.992   | 106.255  | 92.375   | 104.254  | 45.205   | 37.735   | 34.44    | 26.119   | 0.924    | 1.129        | 0.883          |
| Cer[NS]37:2         | 2.423    | 2.049    | 1.583    | 2.171    | 0.684    | 0.684    | 0.535    | 0.995    | 0.653    | 1.371        | 0.344          |
| Cer[NS]38:2         | 68.854   | 65.654   | 73.585   | 61.931   | 49.354   | 42.75    | 61.538   | 39.339   | 1.069    | 0.842        | 1              |
| Cer[NS]39:2         | 4.571    | 5.531    | 4.389    | 4.622    | 2.234    | 2.275    | 2.289    | 2.932    | 0.96     | 1.053        | 0.79           |
| Cer[NS]40:2         | 207.305  | 225.463  | 246.077  | 214.712  | 151.579  | 150.379  | 212.334  | 142.932  | 1.187    | 0.873        | 0.917          |
| Cer[NS]41:2         | 18.435   | 20.728   | 16.293   | 21.057   | 9.645    | 9.521    | 9.777    | 10.543   | 0.884    | 1.292        | 0.895          |
| Cer[NS]42:2         | 895.153  | 844.043  | 904.436  | 809.028  | 675.165  | 568.659  | 661.799  | 273.798  | 1.01     | 0.895        | 0.995          |
| Cer[NS]43:2         | 22.685   | 24.437   | 19.503   | 25.367   | 10.145   | 7.206    | 9.989    | 5.868    | 0.86     | 1.301        | 0.829          |
| Cer[NS]44:2         | 611.793  | 629.392  | 615.463  | 563.926  | 591.665  | 564.666  | 503.855  | 198.622  | 1.006    | 0.916        | 0.792          |
| Cer[NS]45:2         | 15.161   | 14.94    | 9.822    | 13.73    | 9.286    | 7.815    | 5.442    | 6.883    | 0.648    | 1.398        | 0.767          |
| Cer[NS]46:2         | 632.81   | 564.18   | 382.411  | 410.095  | 504.994  | 387.958  | 286.661  | 173.072  | 0.604    | 1.072        | 0.79           |
| Cer[NS]47:2         | 8.362    | 9.059    | 4.969    | 9.334    | 5.311    | 4.501    | 2.479    | 5.624    | 0.594    | 1.878        | 0.279          |
| Cer[NS]48:2         | 415.6    | 413.619  | 269.841  | 328.667  | 334.625  | 263.752  | 177.822  | 172.428  | 0.649    | 1.218        | 0.721          |
| Cer[NS]49:2         | 4.173    | 3.702    | 1.699    | 3.964    | 2.474    | 2.25     | 1.149    | 1.863    | 0.407    | 2.333        | 0.085          |
| Cer[NS]50:2         | 79.378   | 96.657   | 61.049   | 77.936   | 64.058   | 59.918   | 34.806   | 43.762   | 0.769    | 1.277        | 0.728          |
| Cer[NS]32:1         | 301.571  | 306.68   | 261.204  | 259.79   | 155.768  | 138.947  | 134.713  | 68.487   | 0.866    | 0.995        | 0.876          |
| Cer[NS]33:1         | 37.155   | 36.827   | 29.52    | 35.613   | 14.027   | 8.384    | 8.135    | 6.03     | 0.794    | 1.206        | 0.373          |
| Cer[NS]34:1         | 3249.15  | 3637.743 | 3146.112 | 3328.847 | 1258.018 | 1228.447 | 1362.937 | 552.05   | 0.968    | 1.058        | 0.944          |
| Cer[NS]35:1         | 9.795    | 8.342    | 6.957    | 9.874    | 3.805    | 3.904    | 2.684    | 0.831    | 0.71     | 1.419        | 0.239          |
| Cer[NS]36:1         | 750.66   | 791.208  | 661.577  | 814.007  | 338.093  | 246.068  | 238.329  | 227.072  | 0.881    | 1.23         | 0.825          |
| Cer[NS]37:1         | 15.895   | 14.602   | 9.708    | 15.518   | 8.664    | 4.203    | 2.268    | 3.803    | 0.611    | 1.598        | 0.085          |
| Cer[NS]38:1         | 846.817  | 915.861  | 708.212  | 973.155  | 354.816  | 246.001  | 186.178  | 210.44   | 0.836    | 1.374        | 0.254          |
| Cer[NS]39:1         | 50.25    | 51.227   | 34.081   | 59.099   | 28.625   | 25.536   | 14.371   | 31.733   | 0.678    | 1.734        | 0.532          |
| Cer[NS]40:1         | 2728.849 | 2771.405 | 2539.89  | 2878.591 | 1394.637 | 1029.195 | 1309.535 | 1156.533 | 0.931    | 1.133        | 0.819          |
| Cer[NS]41:1         | 202.397  | 198.566  | 136.578  | 223.632  | 115.138  | 94.559   | 60.074   | 112.471  | 0.675    | 1.637        | 0.401          |
| Cer[NS]42:1         | 6327.418 | 6287.925 | 5911.758 | 6218.356 | 3423.084 | 2432.674 | 3252.343 | 2632.491 | 0.934    | 1.052        | 0.96           |
| Cer[NS]43:1         | 274.014  | 274.445  | 205.207  | 305.321  | 154.335  | 128.047  | 93.442   | 165.914  | 0.749    | 1.488        | 0.539          |
| Cer[NS]44:1         | 5680.251 | 5547.25  | 5545.631 | 5420.329 | 2875.593 | 2167.24  | 3053.903 | 2285.251 | 0.976    | 0.977        | 0.913          |
| Cer[NS]45:1         | 70.324   | 70.27    | 54.275   | 74.358   | 41.807   | 42.14    | 28.936   | 44.005   | 0.772    | 1.37         | 0.838          |
| Cer[NS]46:1         | 987.304  | 954.324  | 924.676  | 1060.45  | 635.873  | 536.193  | 599.545  | 680.586  | 0.937    | 1.147        | 0.79           |
| Cer[NS]47:1         | 15.377   | 11.912   | 9.638    | 15.697   | 8.726    | 9.197    | 6.075    | 9.822    | 0.627    | 1.629        | 0.377          |
| Cer[NS]48:1         | 168.054  | 159.653  | 145.576  | 173.85   | 111.824  | 106.528  | 98.647   | 110.876  | 0.866    | 1.194        | 0.846          |
| Cer[NS]49:1         | 4.175    | 3.134    | 2.32     | 4.61     | 1.623    | 1.658    | 1.012    | 1.444    | 0.556    | 1.987        | 0.066          |
| Cer[NS]50:1         | 33.223   | 35.345   | 29.776   | 32.416   | 20.771   | 15.79    | 14.205   | 13.306   | 0.896    | 1.089        | 0.958          |

| Variable     | V        | T       | Th2      | Th2+T    | SD V    | SD T    | SD Th2  | SD Th2+T | FC Th2/V | FC Th2+T/Th2 | Kruskal-Wallis |
|--------------|----------|---------|----------|----------|---------|---------|---------|----------|----------|--------------|----------------|
| Cer[NDS]32:0 | 22.243   | 17.731  | 16.158   | 17.403   | 5.769   | 3.725   | 6.043   | 2.816    | 0.726    | 1.077        | 0.156          |
| Cer[NDS]33:0 | 1.775    | 1.255   | 1.052    | 1.331    | 1.657   | 0.654   | 0.767   | 0.968    | 0.593    | 1.265        | 0.743          |
| Cer[NDS]34:0 | 124.528  | 111.921 | 104.56   | 126.486  | 49.94   | 31.246  | 25.605  | 5.251    | 0.84     | 1.21         | 0.502          |
| Cer[NDS]35:0 | 1.006    | 0.662   | 0.732    | 0.705    | 0.189   | 0.325   | 0.35    | 0.345    | 0.728    | 0.962        | 0.33           |
| Cer[NDS]36:0 | 50.13    | 47.064  | 46.391   | 52.07    | 34.645  | 29.87   | 30.598  | 30.85    | 0.925    | 1.122        | 0.748          |
| Cer[NDS]37:0 | 2.244    | 2.213   | 1.946    | 2.931    | 1.58    | 1.296   | 1.836   | 2.137    | 0.867    | 1.506        | 0.843          |
| Cer[NDS]38:0 | 62.953   | 58.576  | 57.03    | 68.462   | 46.625  | 37.896  | 44.826  | 53.553   | 0.906    | 1.2          | 0.909          |
| Cer[NDS]39:0 | 4.547    | 3.238   | 2.719    | 3.856    | 2.186   | 1.641   | 1.034   | 1.57     | 0.598    | 1.418        | 0.447          |
| Cer[NDS]40:0 | 156.69   | 140.152 | 146.606  | 183.942  | 99.017  | 90.78   | 122.132 | 98.545   | 0.936    | 1.255        | 0.819          |
| Cer[NDS]41:0 | 8.809    | 6.723   | 6.909    | 9.685    | 4.481   | 3.935   | 4.768   | 4.492    | 0.784    | 1.402        | 0.414          |
| Cer[NDS]42:0 | 185.888  | 176.797 | 215.4    | 238.121  | 101.903 | 78.386  | 134.566 | 107.864  | 1.159    | 1.105        | 0.533          |
| Cer[NDS]43:0 | 7.053    | 6.486   | 6.246    | 7.093    | 3.592   | 3.626   | 4.634   | 4.044    | 0.886    | 1.136        | 0.732          |
| Cer[NDS]44:0 | 171.079  | 140.342 | 166.334  | 161.279  | 114.903 | 103.032 | 145.534 | 110.995  | 0.972    | 0.97         | 0.96           |
| Cer[NDS]45:0 | 7.241    | 5.159   | 4.639    | 5.603    | 3.771   | 2.259   | 2.03    | 2.438    | 0.641    | 1.208        | 0.416          |
| Cer[NDS]46:0 | 84.237   | 73.053  | 78.842   | 87.398   | 51.939  | 48.778  | 65.033  | 56.567   | 0.936    | 1.109        | 0.932          |
| Cer[NDS]47:0 | 6.057    | 4.813   | 3.695    | 4.264    | 3.5     | 1.232   | 1.006   | 1.327    | 0.61     | 1.154        | 0.384          |
| Cer[NDS]48:0 | 50.387   | 43.985  | 41.89    | 48.108   | 30.351  | 27.409  | 30.155  | 30.918   | 0.831    | 1.148        | 0.845          |
| Cer[NP]38:0  | 120.277  | 121.364 | 138.344  | 129.861  | 48.914  | 30.418  | 38.207  | 15.734   | 1.15     | 0.939        | 0.74           |
| Cer[NP]39:0  | 8.844    | 9.847   | 8.074    | 9.693    | 4.799   | 3.514   | 2.752   | 0.985    | 0.913    | 1.2          | 0.515          |
| Cer[NP]40:0  | 325.907  | 313.89  | 373.332  | 335.014  | 127.111 | 86.506  | 183.495 | 84.635   | 1.146    | 0.897        | 0.983          |
| Cer[NP]41:0  | 30.418   | 30.305  | 25.208   | 30.271   | 13.378  | 11.285  | 7.288   | 6.249    | 0.829    | 1.201        | 0.69           |
| Cer[NP]42:0  | 1091.252 | 963.1   | 1173.769 | 1043.273 | 308.396 | 158.583 | 402.161 | 147.719  | 1.076    | 0.889        | 0.742          |
| Cer[NP]43:0  | 28.291   | 26.486  | 24.5     | 27.327   | 10.915  | 7.625   | 8.857   | 6.963    | 0.866    | 1.115        | 0.889          |
| Cer[NP]44:0  | 509.72   | 493.832 | 550.248  | 468.123  | 118.994 | 115.707 | 163.703 | 70.469   | 1.08     | 0.851        | 0.739          |
| Cer[NP]45:0  | 12.053   | 10.076  | 10.602   | 9.251    | 6.11    | 2.393   | 2.004   | 1.701    | 0.88     | 0.873        | 0.771          |
| Cer[NP]46:0  | 397.667  | 375.841 | 376.959  | 305.995  | 403.732 | 469.971 | 426.197 | 201.981  | 0.948    | 0.812        | 0.819          |
| Cer[NP]47:0  | 10.4     | 7.205   | 6.993    | 7.472    | 5.398   | 1.66    | 0.971   | 0.901    | 0.672    | 1.068        | 0.588          |
| Cer[NP]48:0  | 333.553  | 375.258 | 249.865  | 275.607  | 218.338 | 223.088 | 237.442 | 76.971   | 0.749    | 1.103        | 0.44           |
| Cer[NP]49:0  | 4.322    | 3.013   | 2.314    | 3.051    | 2.651   | 0.63    | 0.837   | 0.576    | 0.535    | 1.319        | 0.261          |
| Cer[NP]50:0  | 71.53    | 94.931  | 60.187   | 80.682   | 23.897  | 29.314  | 38.027  | 11.615   | 0.841    | 1.341        | 0.314          |
| Cer[AH]34:1  | 9.668    | 10.907  | 10.274   | 9.21     | 8.322   | 9.523   | 10.136  | 6.268    | 1.063    | 0.896        | 0.933          |
| Cer[AH]36:1  | 31.283   | 36.848  | 31.93    | 32.426   | 24.476  | 30.66   | 29.343  | 22.261   | 1.021    | 1.016        | 0.974          |
| Cer[AH]38:1  | 6.654    | 5.795   | 5.309    | 5.428    | 4.185   | 3.578   | 3.633   | 3.127    | 0.798    | 1.022        | 0.668          |
| Cer[AH]40:1  | 27.262   | 28.046  | 15.509   | 34.682   | 30.837  | 34.181  | 14.128  | 41.542   | 0.569    | 2.236        | 0.688          |
| Cer[AH]42:1  | 46.395   | 43.029  | 24.396   | 48.608   | 48.844  | 46.814  | 19.236  | 55.938   | 0.526    | 1.992        | 0.854          |
| Cer[AH]44:1  | 33.212   | 31.931  | 23.919   | 31.122   | 13.512  | 12.948  | 5.921   | 14.039   | 0.72     | 1.301        | 0.659          |
| Cer[AH]46:1  | 14.543   | 13.463  | 11.96    | 11.497   | 9.912   | 8.448   | 7.947   | 6.638    | 0.822    | 0.961        | 0.766          |
| Cer[AP]38:0  | 4.9      | 3.965   | 3.745    | 4.198    | 2.645   | 1.224   | 1.397   | 0.608    | 0.764    | 1.121        | 0.69           |
| Cer[AP]40:0  | 8.086    | 8.212   | 7.295    | 7.824    | 4.796   | 2.779   | 3.043   | 1.073    | 0.902    | 1.073        | 0.809          |
| Cer[AP]42:0  | 30.3     | 26.08   | 25.674   | 24.297   | 14.067  | 4.768   | 6.01    | 4.218    | 0.847    | 0.946        | 0.901          |
| Cer[AP]44:0  | 15.671   | 12.023  | 12.558   | 11.972   | 7.511   | 2.272   | 2.628   | 1.115    | 0.801    | 0.953        | 0.883          |
| Cer[AP]46:0  | 6.465    | 4.368   | 3.902    | 3.493    | 4.837   | 0.613   | 0.949   | 0.707    | 0.603    | 0.895        | 0.178          |

| Variable    | V       | T       | Th2     | Th2+T   | SD V    | SD T    | SD Th2 | SD Th2+T | FC Th2/V | FC Th2+T/Th2 | Kruskal-Wallis |
|-------------|---------|---------|---------|---------|---------|---------|--------|----------|----------|--------------|----------------|
| Cer[NH]40:1 | 15.781  | 22.945  | 18.614  | 20.763  | 9.894   | 13.223  | 16.346 | 8.931    | 1.18     | 1.115        | 0.435          |
| Cer[NH]41:1 | 3.905   | 4.458   | 3.362   | 4.072   | 1.481   | 1.93    | 2.426  | 1.947    | 0.861    | 1.211        | 0.653          |
| Cer[NH]42:1 | 119.129 | 117.868 | 102.385 | 99.059  | 57.916  | 50.129  | 45.253 | 35.138   | 0.859    | 0.968        | 0.655          |
| Cer[NH]43:1 | 7.172   | 7.237   | 4.961   | 5.578   | 2.698   | 1.628   | 2.619  | 2.67     | 0.692    | 1.125        | 0.267          |
| Cer[NH]44:1 | 110.61  | 108.108 | 96.841  | 88.834  | 62.952  | 54.335  | 47.889 | 21.773   | 0.876    | 0.917        | 0.94           |
| Cer[NH]45:1 | 3.441   | 3.262   | 2.112   | 3.193   | 0.718   | 0.908   | 0.799  | 0.713    | 0.614    | 1.512        | <b>0.044</b>   |
| Cer[NH]46:1 | 81.387  | 83.714  | 72.001  | 62.905  | 34.765  | 34.486  | 34.94  | 14.608   | 0.885    | 0.874        | 0.755          |
| Cer[AS]34:1 | 117.714 | 132.066 | 114.854 | 161.501 | 39.469  | 31.909  | 19.386 | 25.331   | 0.976    | 1.406        | 0.069          |
| Cer[AS]35:1 | 23.264  | 22.506  | 21.387  | 21.957  | 17.34   | 17.922  | 16.496 | 16.362   | 0.919    | 1.027        | 0.864          |
| Cer[AS]36:1 | 10.205  | 13.639  | 7.429   | 14.634  | 6.763   | 7.804   | 3.734  | 5.518    | 0.728    | 1.97         | 0.167          |
| Cer[AS]37:1 | 3.52    | 4.243   | 1.822   | 4.045   | 2.141   | 1.693   | 2.243  | 1.198    | 0.518    | 2.22         | 0.191          |
| Cer[AS]38:1 | 60.886  | 65.247  | 38.235  | 74.814  | 52.906  | 30.246  | 21.46  | 20.839   | 0.628    | 1.957        | 0.097          |
| Cer[AS]39:1 | 20.016  | 22.022  | 11.629  | 25.183  | 16.328  | 11.058  | 10.583 | 5.084    | 0.581    | 2.166        | 0.252          |
| Cer[AS]40:1 | 199.794 | 206.556 | 127.798 | 235.23  | 139.45  | 82.476  | 49.141 | 79.342   | 0.64     | 1.841        | 0.128          |
| Cer[AS]41:1 | 42.887  | 52.305  | 21.646  | 59.228  | 33.898  | 22.787  | 19.325 | 20.537   | 0.505    | 2.736        | 0.107          |
| Cer[AS]42:1 | 350.2   | 369.315 | 214.81  | 406.995 | 230.083 | 120.963 | 78.674 | 117.35   | 0.613    | 1.895        | 0.077          |
| Cer[AS]43:1 | 32.142  | 35.475  | 16.36   | 38.451  | 23.173  | 14.089  | 12.784 | 13.279   | 0.509    | 2.35         | 0.228          |
| Cer[AS]44:1 | 203.249 | 210.641 | 156.594 | 217.456 | 109.535 | 62.928  | 51.616 | 77.141   | 0.77     | 1.389        | 0.449          |
| Cer[AS]45:1 | 8.323   | 8.86    | 4.269   | 8.17    | 4.035   | 3.02    | 2.546  | 2.253    | 0.513    | 1.914        | 0.088          |
| Cer[AS]46:1 | 43.456  | 40.239  | 34.612  | 43.903  | 28.578  | 24.347  | 23.09  | 28.069   | 0.797    | 1.268        | 0.87           |

| Variable      | V       | T       | Th2     | Th2+T   | SD V    | SD T    | SD Th2  | SD Th2+T | FC Th2/V | FC Th2+T/Th2 | Kruskal-Wallis |
|---------------|---------|---------|---------|---------|---------|---------|---------|----------|----------|--------------|----------------|
| Cer[EODS]64:2 | 31.302  | 29.801  | 28.152  | 25.798  | 45.79   | 43.678  | 42.006  | 38.945   | 0.899    | 0.916        | 0.872          |
| Cer[EODS]66:2 | 158.978 | 153.396 | 112.118 | 114.578 | 134.485 | 89.724  | 62.497  | 68.331   | 0.705    | 1.022        | 0.779          |
| Cer[EODS]68:2 | 107.131 | 115.202 | 83.175  | 90.78   | 54.337  | 47.603  | 42.881  | 18.673   | 0.776    | 1.091        | 0.695          |
| Cer[EOS]64:3  | 222.846 | 204.009 | 156.529 | 161.03  | 191.448 | 140.365 | 107.059 | 101.839  | 0.702    | 1.029        | 0.809          |
| Cer[EOS]66:3  | 965.313 | 897.068 | 679.523 | 649.214 | 839.596 | 664.375 | 482.775 | 390.776  | 0.704    | 0.955        | 0.782          |
| Cer[EOS]68:3  | 266.899 | 338.615 | 273.418 | 269.888 | 225.079 | 325.325 | 275.482 | 191.121  | 1.024    | 0.987        | 0.867          |
| Cer[EOH]64:3  | 19.102  | 21.791  | 10.717  | 21.014  | 7.773   | 5.688   | 6.161   | 7.971    | 0.561    | 1.961        | 0.068          |
| Cer[EOH]66:3  | 59.624  | 75.666  | 39.248  | 71.981  | 31.076  | 16.558  | 22.617  | 24.608   | 0.658    | 1.834        | 0.121          |
| Cer[EOH]68:3  | 72.078  | 83.497  | 44.781  | 84.792  | 42.24   | 18.687  | 20.096  | 23.455   | 0.621    | 1.893        | 0.093          |
| Cer[EOP]64:2  | 18.306  | 17.827  | 12.996  | 16.097  | 7.642   | 4.855   | 4.765   | 3.484    | 0.71     | 1.239        | 0.351          |
| Cer[EOP]66:2  | 75.438  | 74.92   | 51.777  | 62.004  | 31.645  | 35.604  | 38.666  | 11.123   | 0.686    | 1.198        | 0.218          |
| Cer[EOP]68:2  | 82.664  | 84.365  | 59.029  | 82.729  | 28.823  | 31.682  | 26.61   | 14.444   | 0.714    | 1.401        | 0.355          |

| Variable  | V      | T      | Th2    | Th2+T  | SD V  | SD T  | SD Th2 | SD Th2+T | FC Th2/V | FC Th2+T/Th2 | Kruskal-Wallis |
|-----------|--------|--------|--------|--------|-------|-------|--------|----------|----------|--------------|----------------|
| CerNS(16) | 14.462 | 13.722 | 14.104 | 14.5   | 1.766 | 2.164 | 2.487  | 1.007    | 0.975    | 1.028        | 0.454          |
| CerNS(17) | 0.892  | 0.842  | 0.835  | 0.849  | 0.191 | 0.131 | 0.153  | 0.124    | 0.936    | 1.017        | 0.97           |
| CerNS(18) | 70.48  | 65.164 | 65.854 | 68.558 | 7.013 | 5.977 | 7.085  | 5.228    | 0.934    | 1.041        | 0.256          |
| CerNS(19) | 0.15   | 0.128  | 0.139  | 0.148  | 0.03  | 0.011 | 0.018  | 0.015    | 0.928    | 1.061        | 0.22           |
| CerNS(20) | 3.172  | 2.891  | 3.097  | 3.23   | 1.002 | 0.662 | 0.748  | 0.729    | 0.976    | 1.043        | 0.795          |
| CerNS(22) | 1.108  | 1.031  | 1.092  | 1.048  | 0.698 | 0.325 | 0.532  | 0.24     | 0.986    | 0.96         | 0.95           |
| CerNS(24) | 0.212  | 0.137  | 0.156  | 0.156  | 0.112 | 0.07  | 0.086  | 0.046    | 0.737    | 0.995        | 0.449          |
| CerNP(16) | 2.469  | 2.286  | 2.433  | 2.353  | 0.267 | 0.327 | 0.428  | 0.324    | 0.986    | 0.967        | 0.804          |
| CerNP(18) | 13.963 | 12.388 | 12.604 | 12.776 | 1.147 | 1.041 | 1.512  | 1.196    | 0.903    | 1.014        | 0.064          |
| CerNP(20) | 2.391  | 1.864  | 2.364  | 2.036  | 0.699 | 0.335 | 0.553  | 0.628    | 0.989    | 0.862        | 0.259          |



**Table S12.** Cholesterol sulfate, ceramides and of the selected SBs amounts in HEEs treated with tofacitinib and Th2 cytokines and their combination. Mean values and standard deviation (SD) of Cholesterol Sulfate, ceramides and of the selected SBs amounts (pmol/mg protein) and p-values obtained after Kruskal-Wallis test (V= vehicle; T= tofacitinib).
